# Supplementary material for: All-Optical Electrophysiology for High-Throughput Functional Characterization of a Human iPSC-Derived Motor Neuron Model of ALS
Source: PubMed Central journal article supplement — Stem Cell Reports. 2018 May 17;10(6):1991–2004. doi: 10.1016/j.stemcr.2018.04.020 (PMC5993648; doi:10.1016/j.stemcr.2018.04.020), 2018-05-17
Supplement: mmc2.pdf [file mmc2.pdf]

# All-Optical Electrophysiology for High-Throughput Functional Characterization of a Human iPSC-Derived Motor Neuron Model of ALS

Evangelos Kiskinis,<sup>1,9</sup> Joel M. Kralj,<sup>2,6,9</sup> Peng Zou,<sup>2,7,9</sup> Eli N. Weinstein,<sup>2,3,8,9</sup> Hongkang Zhang,<sup>2,4</sup> Konstantinos Tsioras,<sup>1</sup> Ole Wiskow,<sup>5</sup> J. Alberto Ortega,<sup>1</sup> Kevin Eggan,<sup>5,\*</sup> and Adam E. Cohen<sup>2,3,4,\*</sup>

<sup>1</sup>The Ken & Ruth Davee Department of Neurology, Feinberg School of Medicine, Northwestern University, Chicago, IL 60611, USA

<sup>2</sup>Department of Chemistry and Chemical Biology, Harvard University, Cambridge, MA 02138, USA

<sup>3</sup>Department of Physics, Harvard University, Cambridge, MA 02138, USA

<sup>4</sup>Howard Hughes Medical Institute, Chevy Chase, MD, USA

<sup>5</sup>Department of Stem Cell and Regenerative Biology, Harvard University, Cambridge, MA 02138, USA

<sup>6</sup>Present address: BioFrontiers Institute, CU Boulder, Boulder, CO 80303, USA

<sup>7</sup>Present address: College of Chemistry and Molecular Engineering, Peking University, and Peking-Tsinghua Center for Life Sciences, Beijing 100871, China

<sup>8</sup>Present address: Program in Biophysics, Harvard University, Cambridge, MA 02138, USA

<sup>9</sup>Co-first author

\*Correspondence: [keggan@scrib.harvard.edu](mailto:keggan@scrib.harvard.edu) (K.E.), [cohen@chemistry.harvard.edu](mailto:cohen@chemistry.harvard.edu) (A.E.C.)

<https://doi.org/10.1016/j.stemcr.2018.04.020>

## SUMMARY

Human induced pluripotent stem cell (iPSC)-derived neurons are an attractive substrate for modeling disease, yet the heterogeneity of these cultures presents a challenge for functional characterization by manual patch-clamp electrophysiology. Here, we describe an optimized all-optical electrophysiology, “Optopatch,” pipeline for high-throughput functional characterization of human iPSC-derived neuronal cultures. We demonstrate the method in a human iPSC-derived motor neuron (iPSC-MN) model of amyotrophic lateral sclerosis (ALS). In a comparison of iPSC-MNs with an ALS-causing mutation (*SOD1* A4V) with their genome-corrected controls, the mutants showed elevated spike rates under weak or no stimulus and greater likelihood of entering depolarization block under strong optogenetic stimulus. We compared these results with numerical simulations of simple conductance-based neuronal models and with literature results in this and other iPSC-based models of ALS. Our data and simulations suggest that deficits in slowly activating potassium channels may underlie the changes in electrophysiology in the *SOD1* A4V mutation.

## INTRODUCTION

Cell-reprogramming technologies have created an unprecedented opportunity to study human neurons *in vitro*, probing disease mechanisms under each patient’s unique genetic constellation (Han et al., 2011; Pankevich et al., 2014). Many studies have used induced pluripotent stem cell (iPSC)-based and direct conversion methods to model neurological, neuropsychiatric, and neurodegenerative diseases, effectively describing disease-related phenotypes in multiple neuronal subtypes (Ichida and Kiskinis, 2015). Here we present methodology for the design and analysis of optical electrophysiology experiments on iPSC-based disease models, with application to a model of amyotrophic lateral sclerosis (ALS).

Electrical spiking is the dominant function of every neuron. The spiking patterns, the action potential waveforms, and the subthreshold voltages under different stimulus waveforms represent an integrative phenotype that reflects the activity of a large number of ion channels, transporters, and pumps, as well as the underlying cellular metabolism. While it is not, in general, possible to deduce the complete ion channel composition of a cell from its spiking patterns (Brookings et al., 2014), differences in spiking patterns between disease-model and control states can point to likely differences in ion channel function,

and pharmacological rescue of disease-associated functional phenotypes can support efficacy of a candidate therapeutic.

Electrophysiology data have been traditionally difficult to attain. Manual patch-clamp measurements can be highly accurate but are labor-intensive and slow. Multi-electrode arrays and calcium imaging probe overall spontaneous activity of a culture, but do not probe details of action potential (AP) waveforms, nor are these techniques typically combined with precisely targeted stimulation. The large effort required to record manually from many neurons, combined with the intrinsic variability of iPSC-derived cultures, presents a major obstacle to systematic exploration of patient populations or experimental conditions.

A recently developed system for all-optical electrophysiology (“Optopatch”) addresses this bottleneck (Hochbaum et al., 2014). Optogenetic actuation occurs through a blue light-activated channelrhodopsin, called CheRiff. Voltage imaging occurs through a spectrally orthogonal near-infrared genetically encoded fluorescent voltage indicator called QuasAr2. Specialized optics and software allow simultaneous stimulation and recording from multiple single cells embedded in a complex network (Werley et al., 2017; Zhang and Cohen, 2017). However, low expression levels of the Optopatch construct limited its application

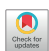

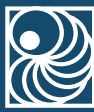

to highly robust primary neuron cultures and to commercially produced iPSC iCell neurons (Hochbaum et al., 2014). Furthermore, limitations in data handling and analysis constrained previous applications to relatively small numbers of well-separated neurons.

Scaling up the Optopatch platform for iPSC-based disease modeling posed a number of challenges in automated data analysis and statistical interpretation. We developed image segmentation techniques to extract the fluorescence traces and morphology of individual neurons, even when they were clumped and overlapping. We developed a suite of filtering and fitting techniques robust to the dominant noise sources in our dataset to extract spike times and AP waveform parameters (Cunningham and Yu, 2014; Druckmann et al., 2013). We then employed systematic regression techniques to determine population- and subpopulation-level differences between the mutant and control cell lines while controlling for significant sources of cell-to-cell variability.

Here we apply Optopatch assays to study the electrical properties of human iPSC-derived motor neurons (iPSC-MNs) in a model of ALS. We developed improved expression constructs and cell-culture protocols to measure spontaneous and optogenetically induced spiking in human iPSC-MNs. We applied these tools to a previously validated model of ALS with the *SOD1* A4V mutation, and its gene-corrected but otherwise isogenic control. We measured 1,771 single cells across six differentiations, for mutant and control, in two independent isogenic pairs. We found that *SOD1* A4V mutant cells had higher spontaneous activity than isogenic controls and greater firing rate at low stimulation, but lower firing rate under strong stimulation due to an increased likelihood of entering depolarization block. Mutant cells also had smaller-amplitude APs. Mutant and genome-corrected cells had indistinguishable maximum firing rates and intra-stimulus accommodation behavior.

To gain mechanistic insight into this array of seemingly distinct functional comparisons, we explored simplified conductance-based Hodgkin-Huxley-type models. Variation of a delayed rectifier potassium channel was sufficient to account for the bulk of our findings. The relative ease of acquiring Optopatch data creates an opportunity to explore electrophysiology in cell-based models of neurological disease in detail and at a population scale, and to make quantitative comparisons with theory.

## RESULTS

### Expression and Characterization of Optopatch in Human iPSC-Derived Motor Neurons

We developed an experimental pipeline to apply Optopatch to an established (Kiskinis et al., 2014; Wainger et al., 2014) human iPSC-based model of ALS (Figure 1A).

The major steps were (1) differentiation of iPSCs into MNs, (2) delivery of Optopatch genes, (3) optical stimulation and recording, (4) image segmentation, (5) voltage trace parameterization, (6) statistical analysis of population differences, and (7) comparison with numerical simulations. We applied the pipeline to two iPSC lines: one derived from an ALS patient (39b) harboring the A4V mutation in the *SOD1* gene, the other an isogenic control cell line (39b-Cor), generated by correcting the mutation in *SOD1* through zinc finger nuclease (ZFN)-mediated gene editing. Both lines have been extensively characterized and validated for pluripotency markers, developmental potency, and genomic integrity described previously (Kiskinis et al., 2014; Wainger et al., 2014). We validated the key results in a second patient-derived line with the same mutation in *SOD1* (RB9d), and a corresponding isogenic control line (RB9d-Cor) (Figures S1A and S1B).

We differentiated the iPSC lines into post-mitotic, spinal MNs using a previously described protocol based on formation of embryoid bodies and subsequent neuralization through dual-SMAD inhibition (Figure 1B). MN specification was achieved through addition of retinoic acid and a Smoothed agonist (Kiskinis et al., 2014; Boulting et al., 2011). We and others have previously shown that the majority of MNs generated through this protocol are FOXP1/HOXA5 positive, indicative of a lateral motor column identity with a rostral phenotype, and are able to form neuromuscular junctions (Kiskinis et al., 2014; Amoroso et al., 2013). This 24-day protocol resulted in highly neuralized cultures (>95% MAP2/TUJ1<sup>+</sup> cells) and significant numbers of spinal MNs (>30% of MAP2/TUJ1<sup>+</sup> were ISL1/2 [ISL]<sup>+</sup>) (Figures S1A and S1B). At the end of the differentiation, MN cultures were plated onto poly-D-lysine/laminin-coated glass-bottomed dishes for subsequent maturation and electrophysiological analysis.

We tested the calcium-calmodulin-dependent kinase II type  $\alpha$  (CamKII $\alpha$ ) promoter as a means to achieve selective and specific expression in iPSC-MNs. Previously published RNA-sequencing data acquired from fluorescence-activated cell sorting-isolated HB9<sup>+</sup> MNs differentiated through this protocol (Kiskinis et al., 2014) revealed strong expression of CAMK2A (Figure S1C). The CamKII $\alpha$  promoter is known to be active in mature excitatory neurons (Lund and McQuarrie, 1997). To validate the specificity of the CamKII $\alpha$  promoter for MNs, we infected iPSC-derived MN cultures with a CamKII $\alpha$ -EGFP lentiviral construct and performed immunocytochemistry for EGFP and ISL (Figure S1D). Of the ISL<sup>+</sup> MNs, 75% expressed EGFP. Of the EGFP<sup>+</sup> cells, 89% were also ISL<sup>+</sup> MNs ( $n = 1,147$  ISL<sup>+</sup> MNs and 1,289 EGFP<sup>+</sup> cells; Figure S1E).

The previously published Optopatch construct (Hochbaum et al., 2014) contained the CheRiff and QuasAr2 genes joined by a self-cleaving 2A peptide. We found

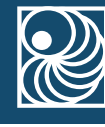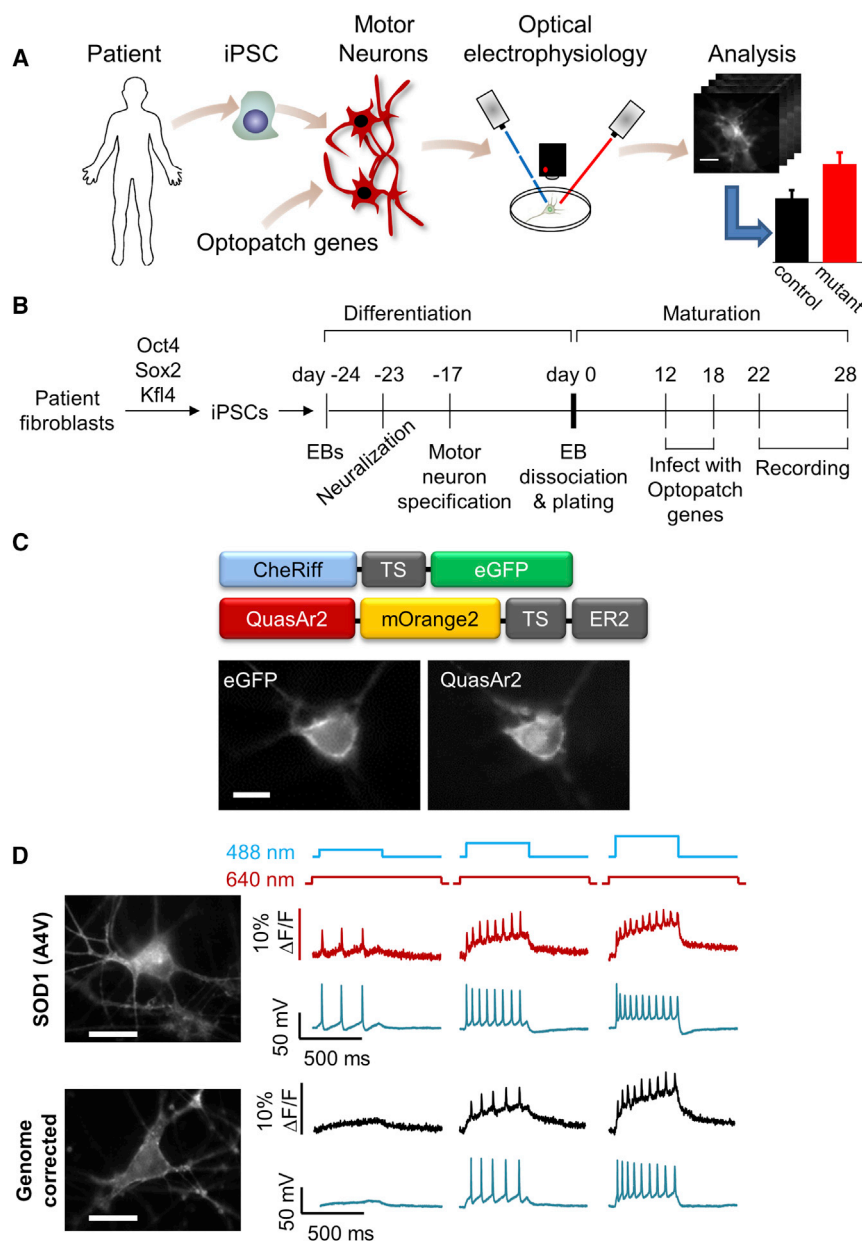

### Figure 1. Optopatch Reports Firing Patterns of iPSC-Derived Motor Neurons in a Model of ALS

(A) Pipeline for disease modeling with optical electrophysiology.

(B) Timeline of motor neuron differentiation, gene transduction, maturation, and measurement.

(C) Top: domain structure of Optopatch constructs. Bottom: images of an iPSC-derived motor neuron expressing both CheRiff-EGFP and QuasAr2-mOrange2.

(D) Simultaneous fluorescence and patch-clamp recordings of spiking in iPSC-derived motor neurons under optical stimulation. Left: images from mutant and genome-corrected controls. Right: fluorescence (red, black) and voltage (blue). Illumination protocols are shown above.

All scale bars, 10  $\mu\text{m}$ . See also [Figure S1](#).

that this construct did not express highly enough for robust functional recordings in iPSC-MNs. The expression level was considerably higher when the two genes were packaged in separate lentiviruses. We generated low-titer lentiviruses (see [Experimental Procedures](#)) for QuasAr2-mOrange2 (Addgene #51692) and CheRiff-EGFP (Addgene #51693), both under control of the CamKII $\alpha$  promoter ([Figure 1C](#)). We delivered the Optopatch genes via lentiviral transduction of the MN cultures 10 days before each recording.

Neurons were imaged 22–28 days post plating. Neurons showed robust expression of EGFP, indicative of CheRiff

expression, as well as near-infrared fluorescence indicative of QuasAr2 expression ([Figure 1C](#)). Both proteins showed extensive membrane trafficking in the soma and in distal processes, although QuasAr2 also showed some intracellular puncta.

Optopatch expression was reported not to have significant effects on electrical properties of primary or iPSC-derived neurons ([Hochbaum et al., 2014](#)), but those measurements did not include MNs. To test for effects of expression on MN electrophysiology, we performed manual patch-clamp measurements in iPSC-MNs expressing either CamKII $\alpha$ -driven Optopatch or a CamKII $\alpha$ -driven



EGFP control (see [Experimental Procedures](#)). Optopatch expression did not significantly perturb resting voltage, membrane resistance, membrane capacitance, rheobase, or AP threshold voltage relative to control cultures expressing EGFP ([Figures S2A–S2E](#)). Both Optopatch and EGFP-transduced cells had slightly lower membrane resistance and higher membrane capacitance than non-transduced controls, indicating that within the heterogeneous *in vitro* neuronal population, the CaMKII $\alpha$  promoter targeted expression to neurons with larger surface area, a marker of greater maturity. We further tested for differences in AP properties between EGFP- and Optopatch-expressing MNs in both *SOD1* A4V and genome-corrected controls. Individual cells showed widely varying firing patterns, particularly in the vicinity of depolarization block, ranging from single spikes to tonic firing. Many cells showed subthreshold ringing oscillations that gradually diminished as the cell entered depolarization block. In neither genotype did we observe significant differences between EGFP- and Optopatch-expressing MNs in AP amplitude, maximum firing rate, or width of the first spike following stimulus onset ([Figures S2F–S2H](#)).

To test whether the optical measurements were a faithful reporter of AP waveforms, we acquired simultaneous manual patch-clamp and optical recordings, with optogenetic stimulation ([Experimental Procedures](#) and [Figure 1D](#)). Fluorescence traces were extracted from single-cell recordings using a previously described pixel-weighting algorithm that automatically identified pixels whose fluorescence correlated with the whole-image mean ([Kralj et al., 2012](#)). APs were resolved optically on a single-trial basis and tagged with an automatic spike-finding algorithm ([Supplemental Experimental Procedures](#)). Of the optically identified spikes, 4% were not automatically identified in the patch-clamp recordings; of the electrically identified spikes, 5% were not automatically identified in the optical recordings ( $n = 148$  spikes, 4 cells). These discrepancies came not from shot noise (which contributed an error rate of  $<10^{-6}$ ) but from low-amplitude oscillations near depolarization block whose classification as spike or not-spike was ambiguous even to human observers (see [Figure 6B](#) for an example).

We compared AP parameters of spikes recorded simultaneously optically and electrically. Optically recorded APs had a root-mean-square error of 1.2 ms in time of peak depolarization relative to the electrical signal ( $n = 148$  spikes, 4 cells), and a systematic overestimate of spike full-width at half-maximum (FWHM) by  $1.8 \pm 1.1$  ms (mean  $\pm$  SD) compared with an electrically recorded mean spike FWHM of 5.6 ms ([Figure S2I](#)). These mean widths included exceptionally broad spikes near onset of depolarization block. The average width for the first electrically recorded AP after stimulus onset was 3.9 ms, comparable with the

literature on developing motor neurons (in rat, AP duration is 9.3 ms at embryonic day 15–16 and 3.4 ms at postnatal day 1–3, at 27°C–29°C [[Ziskind-Conhaim, 1988](#)]). In the electrical recordings, the first AP after stimulus onset was narrower in width (3.9 ms versus 6.7 ms FWHM) and higher in amplitude (74 mV versus 60 mV) than subsequent APs. In the optical recordings the first AP was also narrower than subsequent APs (5.7 ms versus 8.7 ms), but appeared smaller in amplitude (2.5%  $\Delta F/F$  versus 2.8%  $\Delta F/F$ ) than subsequent APs. The differing trends in apparent spike amplitude are explained by low-pass filtering of the optical signal due to the 2-ms exposure time of the camera and the 1.2-ms response time of QuasAr2. This level of time resolution enabled robust spike counting and coarse parameterization of AP waveforms but not detailed analysis of submillisecond dynamics.

The fluorescence signal showed a slow increase in baseline during each optical stimulus epoch ([Figure 1D](#)), which we traced to blue light photoproduction of a red-fluorescent product, as has been reported previously for other Arch-derived voltage indicators ([Venkatachalam et al., 2014](#); [Hou et al., 2014](#)) (see [Supplemental Discussion](#)). This effect had been negligible in previous experiments in primary rodent neurons ([Hochbaum et al., 2014](#)) on account of higher CheRiff expression (necessitating lower blue stimulus intensity) in the primary cells. We did not include gradual changes in baseline in the analysis, focusing instead on spike timing and shape parameters.

### Probing Neuronal Excitability with Optopatch

[Figure 2A](#) shows the illumination protocol used to probe the cell-autonomous excitability of human iPSC-MNs. Recordings were acquired at 500-Hz frame rate for 9,000 frames. Illumination with red light (635 nm, 800 W/cm<sup>2</sup>) induced near-infrared voltage-dependent fluorescence of QuasAr2. Cells were monitored for 10 s without stimulation to quantify spontaneous activity. Cells were then stimulated with eight 500-ms pulses of blue light of linearly increasing intensity from 6 mW/cm<sup>2</sup> to 100 mW/cm<sup>2</sup>. After each blue stimulus pulse, cells were recorded for another 500 ms without blue stimulus and then given 5 s of rest with neither red nor blue illumination. Mutant *SOD1* A4V and genome-corrected control MN cultures were differentiated in parallel, and recordings from paired cultures were performed on the same day.

### Image Segmentation and Data Processing

To accommodate the large quantities of Optopatch data (1,039 movies, 200 gigabytes in total), we developed a pipeline for analysis in a parallel computing environment ([Figure S3](#)). The first stage comprised image segmentation. Cells often clustered, with overlapping somas and intertwined processes. On average, 60% of each cell body area



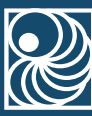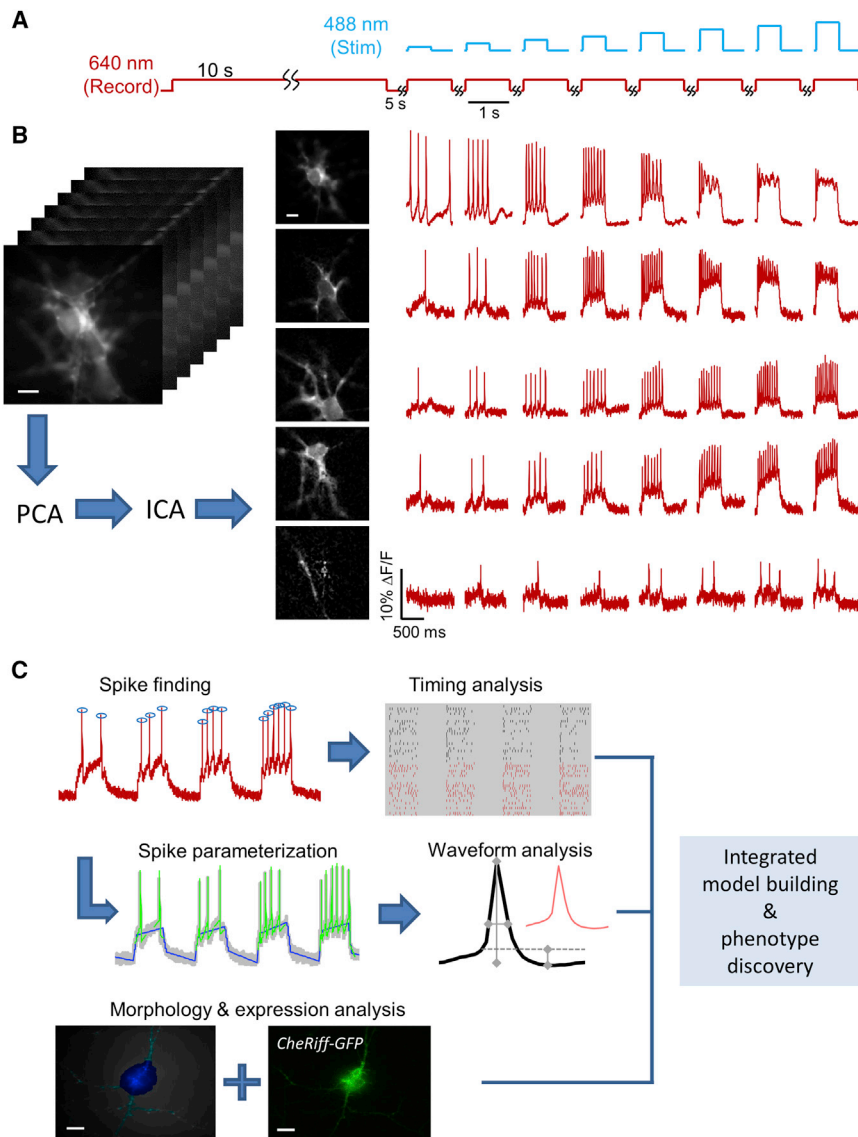

## Figure 2. Optopatch Measurement and Analysis Pipeline

(A) Cells were subject to 10 s of unstimulated recording to measure spontaneous activity (red), and then to eight stimulation pulses of 500 ms duration and increasing intensity (blue).

(B) Activity-based movie segmentation. Image stacks were filtered spatially and temporally, then processed via principal components analysis (PCA) followed by independent components analysis (ICA) to identify clusters of pixels whose fluorescence values co-varied in synchrony. The movie was decomposed into a sum of overlapping neuron images, each with its own spiking pattern.

(C) Parameterization pipeline. Spikes were identified in the fluorescence traces. Spiking patterns were analyzed within stimuli, between stimuli, and between populations. AP waveforms were also parameterized, enabling comparison of width, height, and after-polarization within and between cells. The results of the segmentation in the spatial domain enabled measurement of morphological features (soma versus dendrite) and of CheRiff-EGFP expression level. Finally, all of this information was integrated to build a coherent picture of phenotypic differences between mutant and control cell lines.

All scale bars, 10  $\mu\text{m}$ . See also [Figures S2–S4](#).

overlapped with other cells in the controls, and 63% in the mutants (distribution difference  $p = 0.07$  by Mann-Whitney U test, not significant). The large degree of overlap implied a need to un-mix the fluorescence signals from overlapping cells.

Our segmentation approach was derived from an independent components analysis (ICA) algorithm, originally developed for calcium imaging ([Mukamel et al., 2009](#)), with modifications to accommodate the differing morphological, statistical, and noise properties of voltage imaging data (see [Supplemental Experimental Procedures](#)). In brief, movies were high-pass filtered in time to accentuate the signals from spikes, and low-pass filtered in space to suppress spatially uncorrelated shot noise. Movies were then subjected to principal components analysis (PCA) to reduce

the dimensionality of the dataset, then time-domain ICA to identify linear combinations of principal components that maximized statistical independence between intensity traces. The spatial filters produced from ICA were then applied to the original (unfiltered) movie to extract the underlying intensity traces ([Supplemental Experimental Procedures](#) and [Figure 2B](#)).

Complex images of up to six overlapping neurons were readily decomposed into single-cell traces. No information about cell morphology was used in the image segmentation, so emergence of neuron-shaped objects with corresponding stereotyped AP waveforms confirms the effectiveness of the algorithm. Inspection of the firing patterns revealed negligible crosstalk between signals derived from overlapping cells. Single-cell fluorescence traces

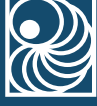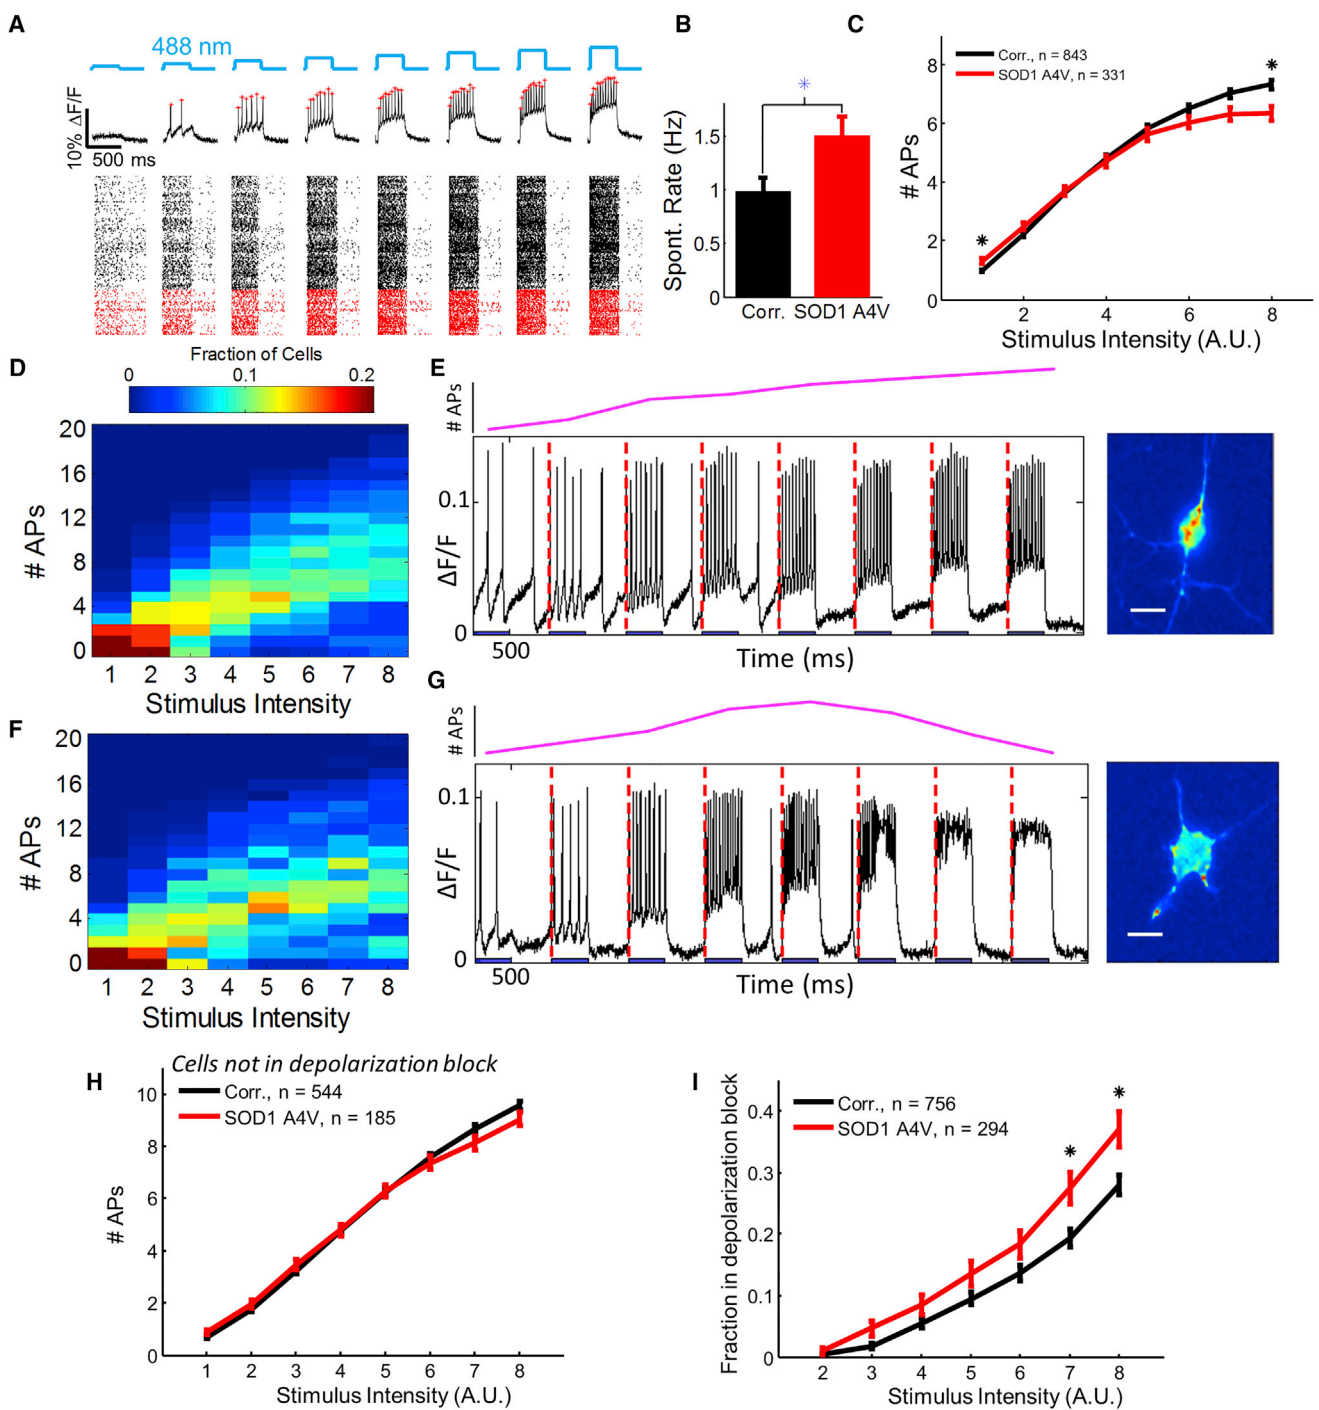

**Figure 3. Comparison of Spiking Patterns in *SOD1* A4V and Control Motor Neurons**  
 (A) Top: representative optical trace with stimulus protocol (blue) and identified spikes (red stars). Bottom: raster plot showing spike timing for a subset of the recorded cells. Black are controls, red are *SOD1* A4V.  
 (B) Spontaneous activity.  
 (C) Population-average number of APs as a function of optogenetic stimulus strength.  
 (D and F) Histograms of number of APs as a function of stimulus intensity for (D) controls and (F) *SOD1* A4V mutants.  
 (E) Left: spike train in a control neuron showing monotonically increasing number of APs as a function of stimulus strength. Right: image of the cell.  
 (G) Left: spike train in a *SOD1* A4V neuron showing monotonically increasing number of APs as a function of stimulus strength. Right: image of the cell.  
 (H) Cells not in depolarization block.  
 (I) Fraction in depolarization block.

(legend continued on next page)

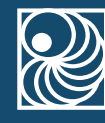

were then processed with a spike-finding algorithm that used a dynamically adjusted threshold to accommodate different signal-to-noise ratios in different cells (Supplemental Experimental Procedures and Figure 2C). Sources were classified as active cells if they showed five or more spikes during the experiment and had a signal-to-noise ratio greater than 5, ensuring a shot noise contribution to errors in spike calling of  $<10^{-6}$ .

The second stage of the pipeline comprised parameterization of the spike waveforms. A standard set of parameters has been proposed to describe AP waveforms recorded via conventional electrophysiology (Druckmann et al., 2013). Fluorescence differs from patch clamp in that fluorescence has a lower signal-to-noise ratio, does not have an absolute voltage scale, is subject to baseline drift, and has lower time resolution. To determine which parameters we could use robustly, we first described spikes with a large set of parameters and then used an information-theoretic approach to eliminate redundancies (Supplemental Discussion and Figure S4). Our final set of parameters described the upstroke duration, downstroke duration, initiation threshold relative to baseline, spike amplitude relative to baseline, and after-hyperpolarization relative to baseline.

Our image segmentation method also enabled quantitative description of cellular morphology. We used filters derived from the activity-based segmentation to identify the two-dimensional footprint of each cell. We then employed morphological image processing to identify cell soma and dendrites (Supplemental Experimental Procedures and Figure S4).

### Comparison of Mutant *SOD1* A4V with Isogenic Control MNs

We compared the firing patterns between iPSC-MNs with the *SOD1* A4V mutation ( $n = 331$ ) and genome-corrected controls ( $n = 843$ ). Figure 3A shows a raster plot of the spike timing for a subset of the cells (not including the recording of spontaneous activity at the start of each trace). Figure 3B shows that, on average, *SOD1* A4V cells had higher spontaneous activity than genome-corrected controls (mean spontaneous rates  $1.50 \pm 0.18$  Hz in mutant,  $0.98 \pm 0.12$  Hz in control;  $p = 0.003$ , Wilcoxon signed-rank test used because of non-normal distribution). Figure 3C shows the population-average spike count in a 500-ms stimulus as a function of stimulus intensity for the two genotypes. The curves for mutant and control crossed: in the most strongly

stimulated epoch, mutant cells fired less on average than controls (mean rates  $12.6 \pm 0.5$  Hz in mutant,  $14.6 \pm 0.3$  Hz in control;  $p = 0.0012$ , unpaired t test). We then performed matched experiments in a second patient-derived *SOD1* A4V cell line (RB9d) and its isogenic control (RB9d-Cor). As with the 39b line, the RB9d mutant cells showed, on average, enhanced spontaneous activity, hyperexcitability at weak stimulus, and hypoexcitability at strong stimulus (Figure S5).

Population-level differences in activity could arise from uniform shifts in all cells or from redistribution of cells among subpopulations with different firing patterns. The single-cell Optopatch data allowed us to examine the underlying distributions of single-cell behavior that led to the population-average differences (Figure 3D for controls and Figure 3F for mutants).

Under strong stimulus, two clear subpopulations emerged: cells that fired rapidly and tonically (Figure 3E) and cells that generated just one or two spikes before going quiet (Figure 3G). We presumed that these quiet cells were constitutively inactive. However, a majority of these cells (64% in the control, 72% in the mutant) fired four or more times during a stimulus of intermediate intensity. These results established that a subpopulation of neurons showed a non-monotonic dependence of firing rate on stimulus strength, with a maximum in firing rate at intermediate stimulus strength.

We then examined the fluorescence waveforms of the cells that inactivated under strong stimulus. These cells were depolarized but not firing, a signature of depolarization block (Pontiggia et al., 1993). To quantify the populations in depolarization block, we defined the onset of depolarization block as a decrease in number of spikes upon an increase in stimulus strength. Cells that did not show depolarization block had statistically indistinguishable firing rates in mutant and control populations at high intensity ( $p = 0.11$ , unpaired t test at the strongest stimulus; Figure 3H). However, the proportion of cells that entered depolarization block differed significantly between mutant and control: at the strongest stimulus, the *SOD1* A4V cells were 32% more likely to be in depolarization block than the controls ( $p = 0.008$ , binomial model t test with Holm-Bonferroni correction, two hypotheses; Figure 3I). This difference in propensity to enter depolarization block under strong stimulus was the most dramatic difference between mutant and control.

(G) Left: spike train in an *SOD1* A4V mutant showing depolarization block upon strong stimulus. Right: image of the cell.

(H) Number of APs as a function of stimulus strength among the subpopulation of cells that did not enter depolarization block. No significant differences were observed between mutant and control.

(I) Fraction of cells in depolarization block as a function of stimulus number.

Error bars represent SEM. Asterisks indicate significance differences between mutant and control,  $*p < 0.01$ . Data in all panels based on  $n = 834$  control neurons,  $n = 331$  *SOD1* A4V, and six rounds of differentiation. Scale bars, 10  $\mu\text{m}$ . See also Figures S5 and S6.

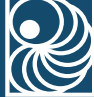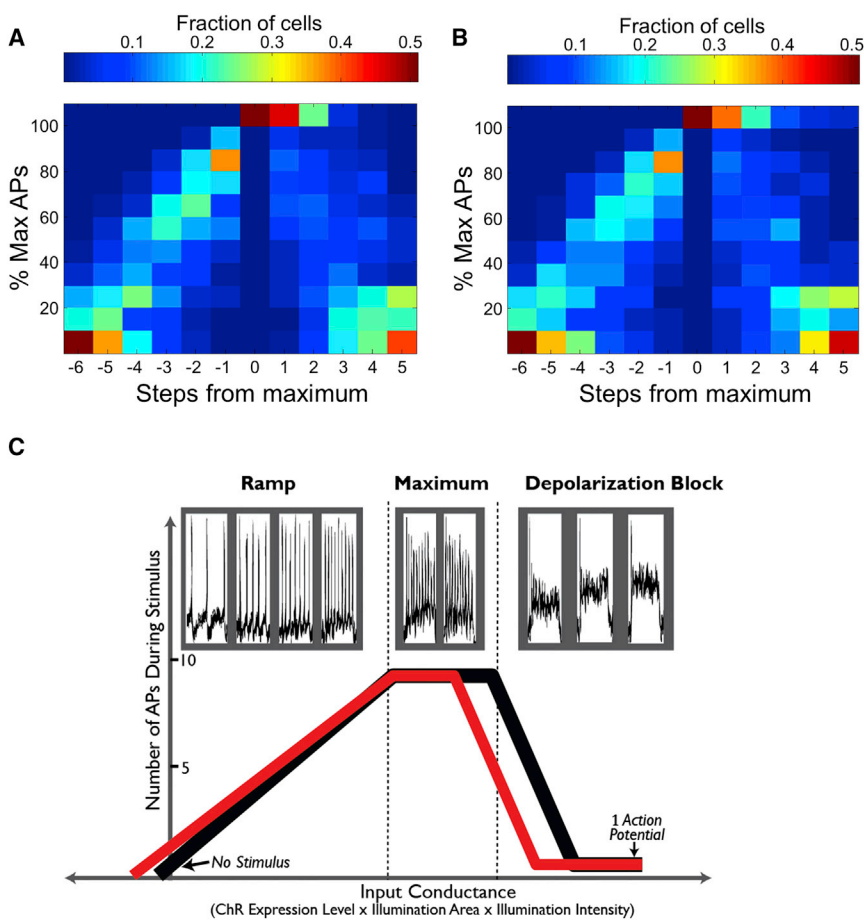

**Figure 4. Characteristic Firing Pattern of iPSC-MNs as a Function of Stimulus Strength**

(A and B) Heatmaps showing universal shape of the F-I curves for control and *SOD1* A4V mutant iPSC-MNs. F-I curves from each cell were rescaled along the x and y axes as follows. Firing rate was expressed as a percentage of the cell's maximum firing rate. Stimulus intensities were aligned to the lowest intensity stimulus at which this maximum firing rate was achieved. This rescaling revealed typical F-I trajectory shapes in a manner that was independent of changes in CheRiff expression level. Control (A) and *SOD1* A4V mutant iPSC-MNs (B) showed a linear increase in firing rate versus stimulus strength for weak stimuli, a plateau in firing rate for moderate stimuli, and a collapse in firing under strong stimuli. Data based on  $n = 834$  control neurons,  $n = 331$  *SOD1* A4V, and six rounds of differentiation. (C) Top: fluorescence traces from a single representative cell passed through three distinct stages of firing in response to monotonically increasing optogenetic stimulus strength. Bottom: fit of piecewise-continuous F-I curves to the data in (A) and (B) for (black) genome-corrected and (red) *SOD1* A4V mutant cell lines. Curves were constructed from measurements of spontaneous rate, average slope of the F-I curve (controlling for expression level), maximum firing rate, and the number of stimulus steps spent at the maximum.

Aligning all cells' F-I curves by the stimulus pulse at which they reached their maximum firing rate revealed a stereotyped F-I curve (Figure 4). Cells showed linear dependence of firing rate on stimulus strength up to a maximum, maintenance of the maximum firing rate in a plateau phase, and then a rapid collapse into depolarization block. The mutant population tended to have a narrower plateau phase and a greater propensity to enter depolarization block than the controls. For cells with matched firing rates at a given stimulus strength, the odds of a cell going into depolarization block in the next stronger stimulus were 88% higher in the mutants than in the controls ( $p = 1.7 \times 10^{-4}$ , logistic regression coefficient t test). The mutant and control neurons reached the same maximum firing rate (mean rates  $8.7 \pm 0.4$  Hz in mutant,  $9.2 \pm 0.3$  Hz in control;  $p = 0.51$ , linear model coefficient t test).

We next studied the timing of the APs within each stimulus epoch. After the first two APs, cells showed nearly constant firing rate throughout the stimulus, provided that the cell was not in depolarization block (Figure 5). To quantify

the degree of firing rate adaptation, we defined the  $n^{\text{th}}$  inter-spike interval by  $ISI_n = t_{n+1} - t_n$ , where  $t_j$  represents the time of peak of spike  $j$ . We then defined the degree of firing rate adaptation by  $\left\langle \frac{ISI_{n+1}}{ISI_n} \right\rangle - 1$ , where the average is over all spikes during a stimulus epoch. This quantity did not differ significantly between *SOD1* A4V and control neurons (8.7% in control, 8.9% in mutants;  $p = 0.87$ , unpaired t test). We also detected no differences between mutant and control in the ratio of first inter-spike interval to the average inter-spike interval during a stimulus epoch,  $\frac{ISI_1}{\langle ISI \rangle}$  (33% in control, 34% in mutant;  $p = 0.45$ , unpaired t test).

Finally, we studied the waveforms of individual APs. Within each 500-ms stimulus epoch, the AP waveform of each single cell was consistent from spike to spike, after the first two spikes, provided that the cell was not in depolarization block (Figure 5 and Supplemental Discussion). AP waveforms did vary with firing rate and with stimulus intensity. After controlling for these parameters, average AP waveforms still differed between mutant and control iPSC-MNs. In the weak stimulus regime, where firing rate



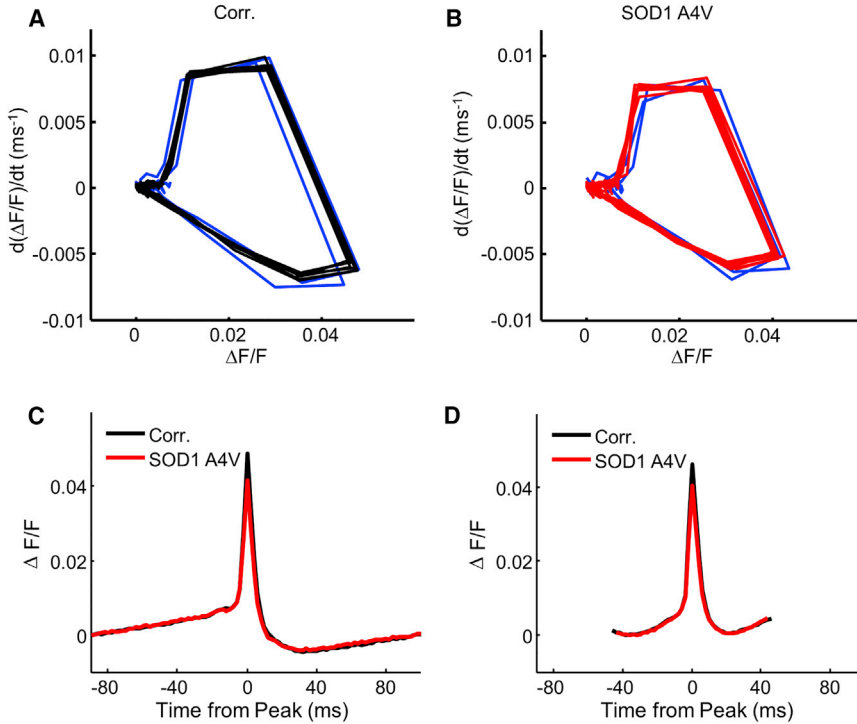

**Figure 5. Comparison of AP Waveforms in Mutant and Control**

(A and B) Average phase plots,  $\left(\frac{d(\Delta F/F)}{dt} \text{ vs } \Delta F/F\right)$ , from steps with nine action potentials, for (A) control and (B) *SOD1 A4V* cell lines. The first two spikes are highlighted in blue, after which the cells converged to a stable limit cycle. (C and D) Average AP waveforms from all stimuli, which produced (C) two and (D) nine APs during a single stimulus epoch. APs from stimuli during which the cell entered depolarization block were excluded. Spikes were aligned in time by their peak and in  $\Delta F/F$  by their pre-peak minimum. Average waveforms from stimulus epochs with different numbers of APs are quantified in Table S2.

was proportional to stimulus strength, mutants had 10% smaller AP peak amplitude than controls ( $p = 3.1 \times 10^{-8}$ , linear model coefficient t test, significant after Holm-Bonferroni multiple comparison correction; Figure 5 and Table S2).

In accord with previous findings (Kiskinis et al., 2014), we observed statistically significant morphological differences between the mutant and control MNs. The mutants had a smaller soma and fewer projections than the controls (Figure S6 and Supplemental Experimental Procedures). This observation suggested that the changes in excitability seen in the mutant cells might be a by-product of the mutant line's differences in morphology. We included terms for soma area and ratio of soma area to whole-cell area ("soma fraction") in a logistic regression model for the probability of depolarization block as a function of firing rate. When trained on control data, the coefficients on these morphological parameters were not significant ( $p = 0.06$  for soma area,  $p = 0.47$  for soma fraction, separate models, logistic regression coefficient t test). When mutant data were controlled for these parameters, the difference between mutant and control remained significant ( $p = 1.4 \times 10^{-4}$  for soma area,  $p = 1.2 \times 10^{-4}$  for soma fraction, logistic regression coefficient t test). Thus morphological parameters (soma area and soma fraction) did not predict the probability of depolarization block either within or between genotypes. While this analysis cannot rule out possible contributions from other morphological

parameters, we focused subsequent analysis on electrophysiological variables.

### Simulations

We sought to relate the phenotypic differences and similarities between *SOD1 A4V* mutant and control neurons to hypotheses about underlying disease mechanisms. While complex multi-compartment models of MNs have been developed (Powers et al., 2012; Powers and Heckman, 2015), it is well established that voltage recordings alone are insufficient to constrain the parameters of such models (Brookings et al., 2014). Furthermore, considering the large cell-to-cell variability in the observed firing patterns, a morphologically and molecularly detailed model was deemed inappropriate. Instead, we sought a parsimonious model that could account for multiple population-level observations with a small number of parameters.

Previous studies have singled out potassium channels in general (Kanai et al., 2006) and  $K_v7$  (*KCNQ*) channels in particular (Wainger et al., 2014) as a target of investigation in both *SOD1* and *C9ORF72* models of ALS, but it is not clear how these mutations affect ion channel expression or function. We asked whether changes in  $K_v7$  current alone could account for some or all of the observed functional effects. We performed numerical simulations of a minimal Hodgkin-Huxley-type model, containing only a  $Na_v$  channel, a fast  $K_v$  channel, a

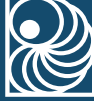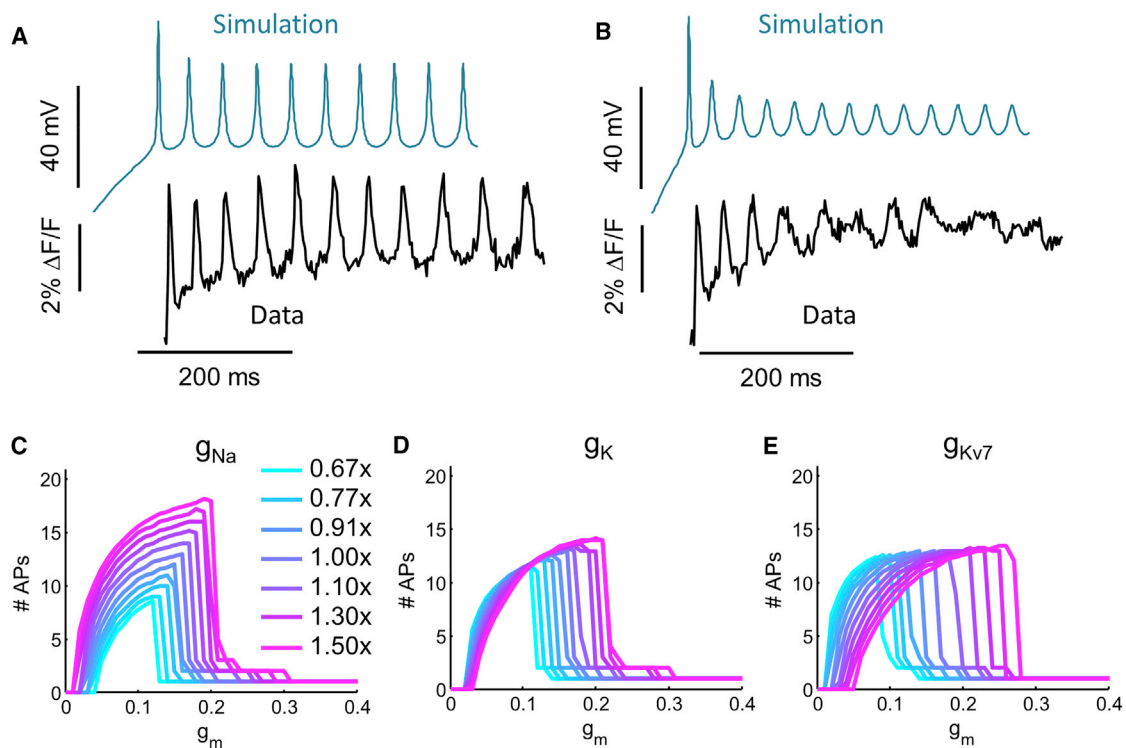

**Figure 6. Numerical Simulation of Firing Patterns with Variable Channel Levels**

(A) Simulation (blue) and fluorescence trace (black) of a neuron showing tonic firing.

(B) Simulation (blue) and fluorescence trace (black) of the same neuron shown in (A) approaching the transition to depolarization block under strong stimulus.

(C–E) Each trace shows the number of APs in a 500-ms interval as a function of the optogenetic stimulus strength ( $g_m$ ). Maximum conductances of the indicated channels were varied from 0.67- to 1.5-fold basal level. (C) Variation in  $Na_v$  level. (D) Variation in  $K_v$  (delayed rectifier) level. (E) Variation in  $K_{v7}$  level. The changes in the F-I curve that came with lower  $K_{v7}$  conductance phenotypically matched the differences and similarities between *SOD1* A4V and control neurons.

slow  $K_{v7}$  channel, and a channelrhodopsin (Powers et al., 2012; Powers and Heckman, 2015). We varied the model parameters systematically and studied the resulting simulated firing patterns using the same parameters as for the experimental data.

The starting ion channel parameters were taken from previous numerical simulations of a human MN (Powers et al., 2012; Powers and Heckman, 2015), and the channelrhodopsin was modeled as a conductance with a reversal potential of 0 mV and an opening time constant of 1 ms. Following our experimental illumination protocol, simulations were run with steps of increasing maximal channelrhodopsin conductance. To account for the capacitive load from passive membrane structures and to match simulated firing rates to the range observed experimentally, we increased the membrane capacitance beyond the literature value (see Supplemental Experimental Procedures). The simulated cells showed stimulus-dependent firing and depolarization block, clearly recapitulating the main qualitative features of the data (Figure 6A). The

experimentally recorded waveforms varied considerably from cell to cell, so we focused on studying the dependence of spiking properties on channel conductances rather than on trying to match simulated and experimental waveforms precisely.

We varied each conductance in the model to determine its effect on low-stimulus excitability, threshold for depolarization block, maximum firing rate, and AP waveform. Figure 6 shows simulated firing rate as a function of optogenetic stimulus strength, for a range of channel conductances bracketing the original model parameters. Decreases in  $K_{v7}$  conductance increased low-stimulus excitability, decreased threshold for depolarization block, decreased spike height, and had no effect on maximum firing rate (Table S3). Thus, remarkably, changes only in the  $K_{v7}$  conductance were sufficient to reproduce all the major functional phenotypes and null results cataloged in our Optopatch experiments. Neither variation in the  $Na_v$  conductance nor in the fast  $K_v$  channel showed the correct qualitative trends (Figure 6).

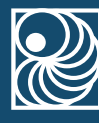

## DISCUSSION

Our demonstration of optical electrophysiology recordings in a delicate and complex human cellular preparation opens the prospect to record large quantities of functional data in this and other human models of neuronal disease. Key to extracting meaning from these data is a statistically robust analysis pipeline and comparisons with numerical simulations at an appropriate level of detail.

### Patch versus Optopatch

The optical and manual patch-clamp techniques offer different tradeoffs in resolution and throughput, and thus should be seen as complementary rather than competing techniques. One must exercise caution in applying concepts from conventional electrophysiology to Optopatch. Principally, Optopatch and patch deliver different kinds of stimulation. CheRiff is a conductance while electrical stimulation is via a current source. CheRiff current reverses direction when the membrane voltage crosses 0 mV, while a current clamp maintains constant current irrespective of membrane voltage. In our MN simulation, the dependence of firing rate on stimulus strength and channel levels had the same qualitative features for CheRiff stimulation as for current injection. In other parameter regimes, however, the two modes of stimulation induced strikingly different firing patterns. Spike trains induced optogenetically may be a more faithful indicator of *in vivo* firing because AMPA ( $\alpha$ -amino-3-hydroxy-5-methyl-4-isoxazolepropionic acid) receptors are a conductance with reversal potential of  $\sim 0$  mV, not a current source. One can simulate membrane conductances with dynamic patch clamp (Prinz et al., 2004), but this technique is not widely used.

Optical and electrical recordings also are subject to different types of noise and artifacts (Cohen and Venkatachalam, 2014). Patch-clamp recordings remain the gold standard for accuracy and time resolution: one can record submillivolt changes in membrane voltage on a submillisecond timescale. One can also use a voltage clamp to dissect the contributions of distinct conductances to membrane currents. However, patch-clamp measurements are slow and laborious (four cells per hour in the present experiments), increasing the risk of statistical artifacts from small sample sizes in highly heterogeneous stem cell-derived cultures. Furthermore, in the most commonly used whole-cell configuration, manual patch clamp risks dialyzing cytoplasmic contents. Manual patch-clamp measurements also lack spatial resolution and are exceedingly difficult to apply to a single cell on successive days.

Optopatch has lower temporal resolution (1–2 ms) and lower precision than patch clamp. The signal-to-noise ratio in the optical recordings was  $13.0 \pm 6.7$  (mean  $\pm$  SD), corre-

sponding to a noise level of approximately 5.2 mV in a 500-Hz bandwidth. The lower signal-to-noise ratio relative to published results in primary rodent neurons (Hochbaum et al., 2014) was due to a smaller soma size and lower Optopatch expression in the iPSC-derived neurons. Cell-to-cell variations in QuasAr2 expression level prevented assignment of absolute voltage values to fluorescence measurements. Thus, Optopatch measurements are most useful for determining spiking statistics and for examining AP waveforms, and at present less so for quantifying sub-threshold events or absolute voltage values.

Optopatch has considerably higher throughput than a manual patch clamp (34 cells per hour in the present experiments). Wide-field imaging systems could potentially increase this throughput considerably (Hochbaum et al., 2014). Although not used here, Optopatch measurements can, in principle, be readily combined with genetic or immunohistochemical targeting with cell-type-specific markers. Measurements targeted to MNs (e.g., via HB9-Cre [Peviani et al., 2012] or post-measurement HB9 staining) are a natural extension of the work. Optopatch can also probe spatial relations of electrical activity, both within and between cells.

### Neuronal Excitability in ALS

Our simple computational models showed non-monotonic dependence of firing rate on stimulus strength in all cases, consistent with our data. Variations in  $K_{V7}$  currents led to firing rate curves that crossed each other. Together, these observations show that “excitability” is not a well-defined attribute of a neuron, but rather depends on the magnitude of the stimulus strength. In our data, in both the mutant and controls cells with a higher spontaneous rate were more likely to show a decrease in firing under strong stimulus: the odds of entering depolarization block increased by 34% with every 1-Hz increase in spontaneous rate ( $p = 0.005$ , logistic regression coefficient  $t$  test) in control and 49% per Hz in mutant ( $p = 0.0004$ ). Thus neurons that appeared hyperexcitable under weak or zero stimulus tended to appear hypoexcitable under strong stimulus. One should therefore use caution in speaking of hyper- or hypoexcitability as intrinsic neuronal properties.

These observations also highlight the importance of analyzing neuronal recordings at the single-cell level rather than simply looking at aggregate population-level statistics. The population-average curves of firing frequency versus stimulus strength may be strikingly different from the curves for every individual neuron. Due to the non-linear dependence of firing frequency on ion channel levels, efforts to fit the population-average data may lead to incorrect mechanistic conclusions.

By recording data in two pairs of mutant and genome-corrected lines, we can compare the effect size due to the



*SOD1* A4V mutation versus the effect size due to line-to-line differences (39b-Cor versus RB9d-Cor). In our recordings, the line-to-line differences in firing rate were comparable in magnitude with the difference between mutant and corrected within each line (Figure S5). At present it is not known whether these line-to-line differences reflect underlying genetic heterogeneity or epigenetic effects reflecting the different histories of the iPSC lines. Resolving that question would require comparisons of multiple lines derived from the same individuals, as well as lines derived from different individuals. Nonetheless, these results highlight the importance of making matched isogenic comparisons when looking for mutation-associated phenotypes at the level of individual lines.

The pathways by which mutations in ALS-causing genes lead to a change in neuronal excitability remain unknown. The  $K_v7$  potassium channel has recently emerged as a potential therapeutic target and is the subject of an ongoing clinical trial of retigabine for ALS (McNeish et al., 2015). While expression profiling did not identify effects of the *SOD1* A4V mutation at the transcriptional level (Kiskinis et al., 2014), there are many post-translational mechanisms for regulating the  $K_v7$  current. This channel has multiple interaction partners (Delmas and Brown, 2005), is regulated by  $\text{PtdIns}(4,5)\text{P}_2$  (Suh and Hille, 2008), and is redox sensitive (Gamper et al., 2006). Thus defects in any of these interaction partners, in lipid metabolism, or in redox homeostasis could contribute to excitability defects. Recently, deficits in trafficking of RNA granules have been found in a *TDP43* model of ALS (Alami et al., 2014). These findings provide a plausible mechanism for proteostatic deficits in ALS, including deficits in ion channels.

In a mutant *C9ORF72* model of ALS, Sareen et al. (2013) reported hypoexcitability of the mutants relative to controls. However, the previously published plots of firing frequency as a function of stimulus strength (Figures 3H and S12 of Sareen et al.) resemble our data showing depolarization block at strong stimulus (Figures 3B and 3C). Although we did not probe the *C9ORF72* model, these observations raise the intriguing possibility that loss of  $K_v7$  conductance could provide a common mechanism across genotypes. The sufficiency of a  $K_v7$  deficit to account for both hyper- and hypoexcitability phenotypes cannot rule out other possible contributions to the electrophysiology, including other ion channels, shifts in channel kinetics or gating thresholds, and shifts in cellular morphology, resting potential, or ion channel spatial distribution.

The iPSC-MNs studied here represent an immature developmental state, while ALS typically strikes in adulthood. Whereas the disease-causing mutation is present throughout the life of the patient, its effect is clearly age dependent. It is not known whether time *in vitro* is a realistic proxy for chronological age *in vivo* and, if so, the rela-

tive scaling of these timelines. Thus, while time-course data *in vitro* may yield interesting changes in function or physiology, it is not clear whether such data provide information relevant to age-related processes. Despite these limitations, functional optogenetic screening has potential uses in identifying disease mechanisms, testing prospective therapeutics, and stratifying patients.

## EXPERIMENTAL PROCEDURES

### Cell Culture

All cell cultures were maintained at 37°C and 5%  $\text{CO}_2$ . Cells tested negative for mycoplasma contamination. Pluripotent stem cells were grown on Matrigel (BD Biosciences) with mTeSR1 medium (STEMCELL Technologies). Culture medium was changed every 24 hr and cells were passaged by Dispase (Gibco) or Accutase (Innovative Cell Technologies) as required.

### Motor Neuron Differentiation

Stem cell cultures were differentiated into motor neurons as previously described (Kiskinis et al., 2014). In brief, iPSCs were dissociated to single cells and plated in suspension in low-adherence flasks (400 k/mL), in mTeSR medium with 10  $\mu\text{M}$  ROCK inhibitor. Medium was gradually diluted (50% on day 3 and 100% on day 4) to knockout serum replacement (KOSR) (DMEM/F12, 10% KOSR) between days 1 and 4 and to a neural induction medium (DMEM/F12 with L-glutamine, non-essential amino acids [NEAA], 2  $\mu\text{g}/\text{mL}$  heparin, N2 supplement [Invitrogen]) for days 5–24. From days 1–6 cells were cultured in the presence of 10  $\mu\text{M}$  SB431542 (Sigma-Aldrich) and 1  $\mu\text{M}$  dorsomorphin (Stemgent), and from days 5–24 with 10 ng/mL brain-derived neurotrophic factor (BDNF; R&D Systems), 0.4  $\mu\text{g}/\text{mL}$  ascorbic acid (Sigma), 1  $\mu\text{M}$  retinoic acid (Sigma), and 1  $\mu\text{M}$  Smoothed agonist 1.3 (Calbiochem). On day 24 floating cell aggregates were dissociated to single cells with Papain/DNase (Worthington Bio) and plated onto poly-D-lysine/laminin-coated dishes for electrophysiological analysis. Once dissociated, MN cultures were fed every 2–3 days with complete neurobasal medium (neurobasal with L-glutamine, NEAA, Glutamax, N2, and B27), with 10 ng/mL BDNF/ciliary neurotrophic factor/glia cell-derived neurotrophic factor (R&D) and 0.2  $\mu\text{g}/\text{mL}$  ascorbic acid (Sigma).

### Gene Editing

Correction of the *SOD1* A4V mutation in the ALS patient iPSC line RB9d was performed using ZFN-mediated targeting as described previously (Kiskinis et al., 2014).

### Electrophysiology

Measurements were conducted in Tyrode's solution containing 125 mM NaCl, 2.5 mM KCl, 3 mM  $\text{CaCl}_2$ , 1 mM  $\text{MgCl}_2$ , 10 mM HEPES, and 30 mM glucose (pH 7.3) and adjusted to 305–310 mOsm with sucrose. Prior to imaging, neurons were incubated with 5  $\mu\text{M}$  all-*trans* retinoic acid for 30 min and then washed with Tyrode's solution.

Synaptic blockers were added to the imaging medium for measurements of single-cell electrophysiology. The blockers comprised



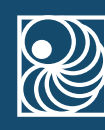

10  $\mu\text{M}$  NBQX (Tocris), 25  $\mu\text{M}$  D(-)-2-amino-5-phosphonovaleric acid (Tocris), and 20  $\mu\text{M}$  gabazine (SR-95531; Tocris). Patch-clamp data were used if and only if access resistance was  $<25\ \Omega$ , and did not vary over the experiment. Recordings were terminated if membrane resistance changed by  $>10\%$ . Experiments were performed at  $23^\circ\text{C}$  under ambient atmosphere.

### Optopatch Recordings

Cells were imaged on a custom-built epifluorescence inverted microscope. Imaging experiments were conducted in Tyrode's buffer (pH 7.3). Excitation of QuasAr2 was via a 500-mW 640-nm diode laser (Dragon Lasers), which provided a field of view of  $31 \times 37\ \mu\text{m}$ , with an intensity at the sample of  $800\ \text{W}/\text{cm}^2$ . Blue illumination from a 50-mW 488-nm solid-state laser (Coherent OBIS) was modulated by an acousto-optical tunable filter (Gooch and Housego) to control timing and amplitude of the optogenetic stimulation. The blue and red beams were then combined and imaged onto the sample through the objective lens. Images were collected with a  $60\times$  water objective (Olympus, numerical aperture 1.2) and imaged onto a scientific CMOS camera (Flash 4.0, Hamamatsu). Data were collected at a frame rate of 500 Hz. Custom code written in LabView (National Instruments) controlled the hardware.

The stimulation protocol consisted of:

1. 10 s of continuous red light to measure spontaneous firing
2. 50 ms with red light only
3. 500 ms with red and blue light to stimulate firing
4. 500 ms with red light only
5. 5 s with no light for cell recovery

Steps 2–5 were repeated 8–10 times with increasing intensities of blue light.

Procedures for immunocytochemistry, virus production, gene delivery, data analysis, and simulation are described in detail in [Supplemental Experimental Procedures](#).

### SUPPLEMENTAL INFORMATION

Supplemental Information includes Supplemental Discussion, Supplemental Experimental Procedures, six figures, and three tables and can be found with this article online at <https://doi.org/10.1016/j.stemcr.2018.04.020>.

### AUTHOR CONTRIBUTIONS

E.K., J.M.K., K.E., and A.E.C. designed the project. E.K. performed iPSC differentiation and characterization. J.M.K., P.Z., and H.Z. performed Optopatch and manual patch-clamp recordings. J.A.O., O.W., and K.T. performed differentiations and neuronal characterization. J.M.K., P.Z., H.Z., E.N.W., and A.E.C. analyzed the data. E.K., J.M.K., E.N.W., and A.E.C. wrote the manuscript with input from all other authors. E.K., K.E., and A.E.C. oversaw the research.

### ACKNOWLEDGMENTS

Scott Linderman provided an optimization algorithm for fitting piecewise linear functions. Vicente Parot helped with PCA-ICA segmentation. Samouil Farhi performed patch-clamp electrophysi-

ology measurements. This work was supported by US NIH grants 1-R01-EB012498 and 1-DP2-OD007428 and support from the Howard Hughes Medical Institute. The Kiskinis lab is supported by grants from the Les Turner ALS Foundation and the Muscular Dystrophy Association. E.K. is a Les Turner ALS Research and Patient Center Investigator. K.E. acknowledges support from Project ALS, Target ALS, and National Institute of Neurological Disorders and Stroke of the NIH awards R01NS089742 and RC2NS069395. J.M.K. and E.K. own stock in Q-State Biosciences. E.N.W. has worked as a consultant for Q-State Biosciences. K.E. and A.E.C. are co-founders of Q-State Biosciences.

Received: October 17, 2017

Revised: April 20, 2018

Accepted: April 22, 2018

Published: May 17, 2018

### REFERENCES

- Alami, N.H., Smith, R.B., Carrasco, M.A., Williams, L.A., Winborn, C.S., Han, S.S.W., Kiskinis, E., Winborn, B., Freibaum, B.D., Kanagaraj, A., et al. (2014). Axonal transport of TDP-43 mRNA granules is impaired by ALS-causing mutations. *Neuron* *81*, 536–543.
- Amoroso, M.W., Croft, G.F., Williams, D.J., O'Keeffe, S., Carrasco, M.A., Davis, A.R., Roybon, L., Oakley, D.H., Maniatis, T., Henderson, C.E., and Wichterle, H. (2013). Accelerated high-yield generation of limb-innervating motor neurons from human stem cells. *J. Neurosci.* *33*, 574–586.
- Boulting, G.L., Kiskinis, E., Croft, G.F., Amoroso, M.W., Oakley, D.H., Wainger, B.J., Williams, D.J., Kahler, D.J., Yamaki, M., Davidow, L., et al. (2011). A functionally characterized test set of human induced pluripotent stem cells. *Nat. Biotechnol.* *29*, 279–286.
- Brookings, T., Goeritz, M.L., and Marder, E. (2014). Automatic parameter estimation of multicompartmental neuron models via minimization of trace error with control adjustment. *J. Neurophysiol.* *112*, 2332–2348.
- Cohen, A.E., and Venkatachalam, V. (2014). Bringing bioelectricity to light. *Annu. Rev. Biophys.* *43*, 211–232.
- Cunningham, J.P., and Yu, B.M. (2014). Dimensionality reduction for large-scale neural recordings. *Nat. Neurosci.* *17*, 1500–1509.
- Delmas, P., and Brown, D.A. (2005). Pathways modulating neural KCNQ/M (Kv7) potassium channels. *Nat. Rev. Neurosci.* *6*, 850–862.
- Druckmann, S., Hill, S., Schürmann, F., Markram, H., and Segev, I. (2013). A hierarchical structure of cortical interneuron electrical diversity revealed by automated statistical analysis. *Cereb. Cortex* *23*, 2994–3006.
- Gamper, N., Zaika, O., Li, Y., Martin, P., Hernandez, C.C., Perez, M.R., Wang, A.Y., Jaffe, D.B., and Shapiro, M.S. (2006). Oxidative modification of M-type K(+) channels as a mechanism of cytoprotective neuronal silencing. *EMBO J.* *25*, 4996–5004.
- Han, S.S., Williams, L.A., and Eggan, K.C. (2011). Constructing and deconstructing stem cell models of neurological disease. *Neuron* *70*, 626–644.



- Hochbaum, D.R., Zhao, Y., Farhi, S.L., Klapoetke, N., Werley, C.A., Kapoor, V., Zou, P., Kralj, J.M., Maclaurin, D., Smedemark-Margulies, N., et al. (2014). All-optical electrophysiology in mammalian neurons using engineered microbialrhodopsins. *Nat. Methods* *11*, 825–833.
- Hou, J.H., Venkatachalam, V., and Cohen, A.E. (2014). Temporal dynamics of microbialrhodopsin fluorescence reports absolute membrane voltage. *Biophys. J.* *106*, 639–648.
- Ichida, J.K., and Kiskinis, E. (2015). Probing disorders of the nervous system using reprogramming approaches. *EMBO J.* *34*, 1456–1477.
- Kanai, K., Kuwabara, S., Misawa, S., Tamura, N., Ogawara, K., Nakata, M., Sawai, S., Hattori, T., and Bostock, H. (2006). Altered axonal excitability properties in amyotrophic lateral sclerosis: impaired potassium channel function related to disease stage. *Brain* *129*, 953–962.
- Kiskinis, E., Sandoe, J., Williams, L.A., Boulting, G.L., Moccia, R., Wainger, B.J., Han, S., Peng, T., Thams, S., Mikkilineni, S., et al. (2014). Pathways disrupted in human ALS motor neurons identified through genetic correction of mutant SOD1. *Cell Stem Cell* *14*, 781–795.
- Kralj, J.M., Douglass, A.D., Hochbaum, D.R., Maclaurin, D., and Cohen, A.E. (2012). Optical recording of action potentials in mammalian neurons using a microbialrhodopsin. *Nat. Methods* *9*, 90–95.
- Lund, L.M., and McQuarrie, I.G. (1997). Calcium/calmodulin-dependent protein kinase II expression in motor neurons: effect of axotomy. *J. Neurobiol.* *33*, 796–810.
- McNeish, J., Gardner, J.P., Wainger, B.J., Woolf, C.J., and Eggan, K. (2015). From dish to bedside: lessons learned while translating findings from a stem cell model of disease to a clinical trial. *Cell Stem Cell* *17*, 8–10.
- Mukamel, E.A., Nimmerjahn, A., and Schnitzer, M.J. (2009). Automated analysis of cellular signals from large-scale calcium imaging data. *Neuron* *63*, 747–760.
- Pankevich, D.E., Altevogt, B.M., Dunlop, J., Gage, F.H., and Hyman, S.E. (2014). Improving and accelerating drug development for nervous system disorders. *Neuron* *84*, 546–553.
- Peviani, M., Kurosaki, M., Terao, M., Lidonnici, D., Gensano, F., Battaglia, E., Tortarolo, M., Piva, R., and Bendotti, C. (2012). Lentiviral vectors carrying enhancer elements of Hb9 promoter drive selective transgene expression in mouse spinal cord motor neurons. *J. Neurosci. Methods* *205*, 139–147.
- Pontiggia, A., Negri, A., Beltrame, M., and Bianchi, M.E. (1993). Protein HU binds specifically to kinked DNA. *Mol. Microbiol.* *7*, 343–350.
- Powers, R.K., and Heckman, C.J. (2015). Contribution of intrinsic motoneuron properties to discharge hysteresis and its estimation based on paired motor unit recordings: a simulation study. *J. Neurophysiol.* *114*, 184–198.
- Powers, R.K., Elbasiouny, S.M., Rymer, W.Z., and Heckman, C.J. (2012). Contribution of intrinsic properties and synaptic inputs to motoneuron discharge patterns: a simulation study. *J. Neurophysiol.* *107*, 808–823.
- Prinz, A.A., Abbott, L., and Marder, E. (2004). The dynamic clamp comes of age. *Trends Neurosci.* *27*, 218–224.
- Sareen, D., O'Rourke, J.G., Meera, P., Muhammad, A.K., Grant, S., Simpkinson, M., Bell, S., Carmona, S., Ornelas, L., Sahabian, A., et al. (2013). Targeting RNA foci in iPSC-derived motor neurons from ALS patients with a C9ORF72 repeat expansion. *Sci. Transl. Med.* *5*, 208ra149.
- Suh, B.C., and Hille, B. (2008). PIP2 is a necessary cofactor for ion channel function: how and why? *Annu. Rev. Biophys.* *37*, 175–195.
- Venkatachalam, V., Brinks, D., Maclaurin, D., Hochbaum, D., Kralj, J., and Cohen, A.E. (2014). Flash memory: photochemical imprinting of neuronal action potentials onto a microbialrhodopsin. *J. Am. Chem. Soc.* *136*, 2529–2537.
- Wainger, B.J., Kiskinis, E., Mellin, C., Wiskow, O., Han, S.S., Sandoe, J., Perez, N.P., Williams, L.A., Lee, S., Boulting, G., et al. (2014). Intrinsic membrane hyperexcitability of amyotrophic lateral sclerosis patient-derived motor neurons. *Cell Rep.* *7*, 1–11.
- Werley, C.A., Chien, M.P., and Cohen, A.E. (2017). An ultrawide-field microscope for high-speed fluorescence imaging and targeted optogenetic stimulation. *Biomed. Opt. Express* *8*, 5794–5813.
- Zhang, H., and Cohen, A.E. (2017). Optogenetic approaches to drug discovery in neuroscience and beyond. *Trends Biotechnol.* *35*, 625–639.
- Ziskind-Conhaim, L. (1988). Electrical properties of motoneurons in the spinal cord of rat embryos. *Dev. Biol.* *128*, 21–29.

**Stem Cell Reports, Volume 10**

**Supplemental Information**

**All-Optical Electrophysiology for High-Throughput Functional Characterization of a Human iPSC-Derived Motor Neuron Model of ALS**

**Evangelos Kiskinis, Joel M. Kralj, Peng Zou, Eli N. Weinstein, Hongkang Zhang, Konstantinos Tsioras, Ole Wiskow, J. Alberto Ortega, Kevin Eggan, and Adam E. Cohen**

**Alterations in neuronal excitability in ALS probed through optical electrophysiology studies of human iPSC-derived motor neurons**

Evangelos Kiskinis, Joel M. Kralj, Peng Zou, Eli N. Weinstein, Hongkang Zhang, Konstantinos Tsiaras, Ole Wiskow, J. Alberto Ortega, Kevin Eggan & Adam E. Cohen

**Supplemental Material**

**Inventory of Supplemental Information**

Figures S1 – S6

Tables S1 – S3

Supplemental Discussion

Supplemental Experimental Procedures

Supplemental References



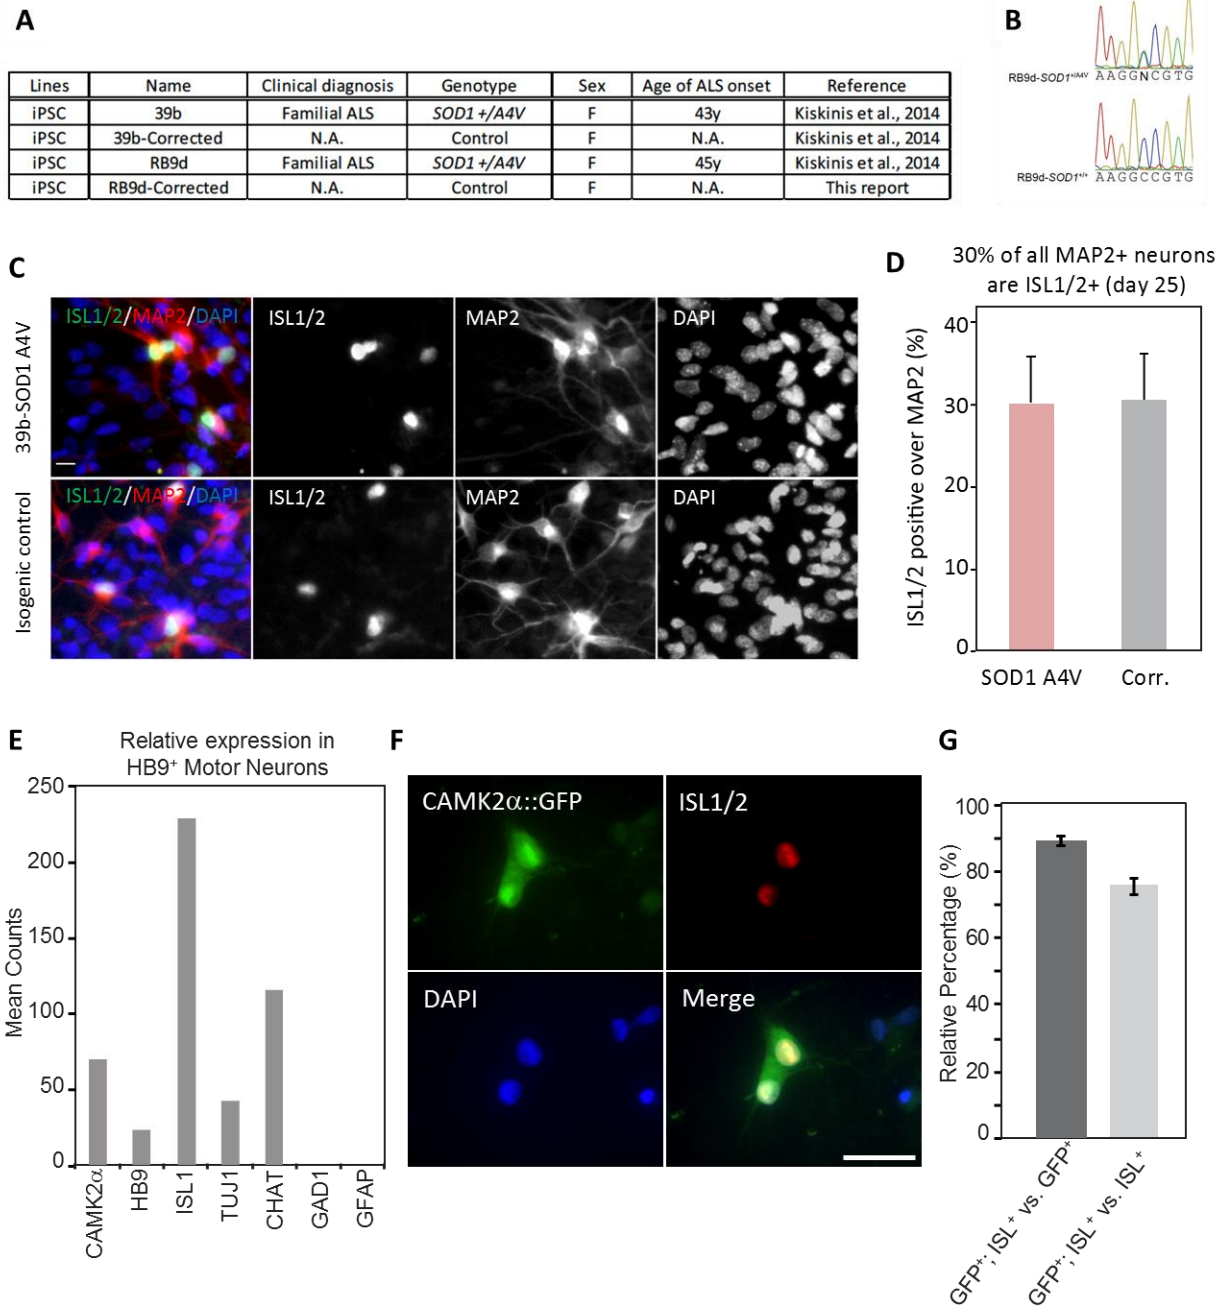

**Figure S1.** Characterization of human motor neurons derived from iPSCs. Related to Fig. 1. (A) ALS patient-iPSC lines and isogenic controls used in this study. (B) Sequencing chromatographs of exon 1 of *SOD1* in patient line RB9d before and after gene-targeting demonstrate the successful correction of the A4V mutation. Editing was performed using Zinc Finger Nucleases as described previously (Kiskinis et al., 2014). (C) Immunocytochemistry for a MN marker (ISL1/2), a pan-neuronal marker (MAP2) and a nuclear marker (DAPI). Scale bar 50  $\mu$ m. (D) Quantification of MN populations. Error bars represent standard deviation of the percentage of ISL1/2<sup>+</sup> cells from 4 images from 1 differentiation (SOD1 A4V:  $n = 407$  MAP2<sup>+</sup> cells; Corrected:  $n = 291$  MAP2<sup>+</sup> cells). (E) Analysis of previously published RNA-Seq data from iPSC-derived HB9<sup>+</sup> MNs purified via FACS (Kiskinis et al., 2014; GEO entity: GSE54409). These cells expressed CAMK2 $\alpha$ , HB9, TUJ1 and CHAT, while the glial marker GFAP and the interneuron marker

GAD1 were absent. (F) Immunocytochemistry to detect the selectivity and specificity in MNs of lentivirally delivered constructs with the CamKII $\alpha$  promoter. Images show MN cultures infected with lentivirus containing CamKII $\alpha$ -driven eGFP. Cells were labelled by immunocytochemistry with antibodies for ISL1/2 and eGFP, and DAPI; scale bar 30  $\mu$ M. (G) Quantification of images as in (E). 89% of eGFP<sup>+</sup> cells were also ISL<sup>+</sup>. 75% of all ISL<sup>+</sup> MNs were also eGFP<sup>+</sup>. Error bars represent s.e.m. from 42 images taken from 2 independent differentiations,  $n = 1147$  ISL<sup>+</sup> human iPSC-MNs.

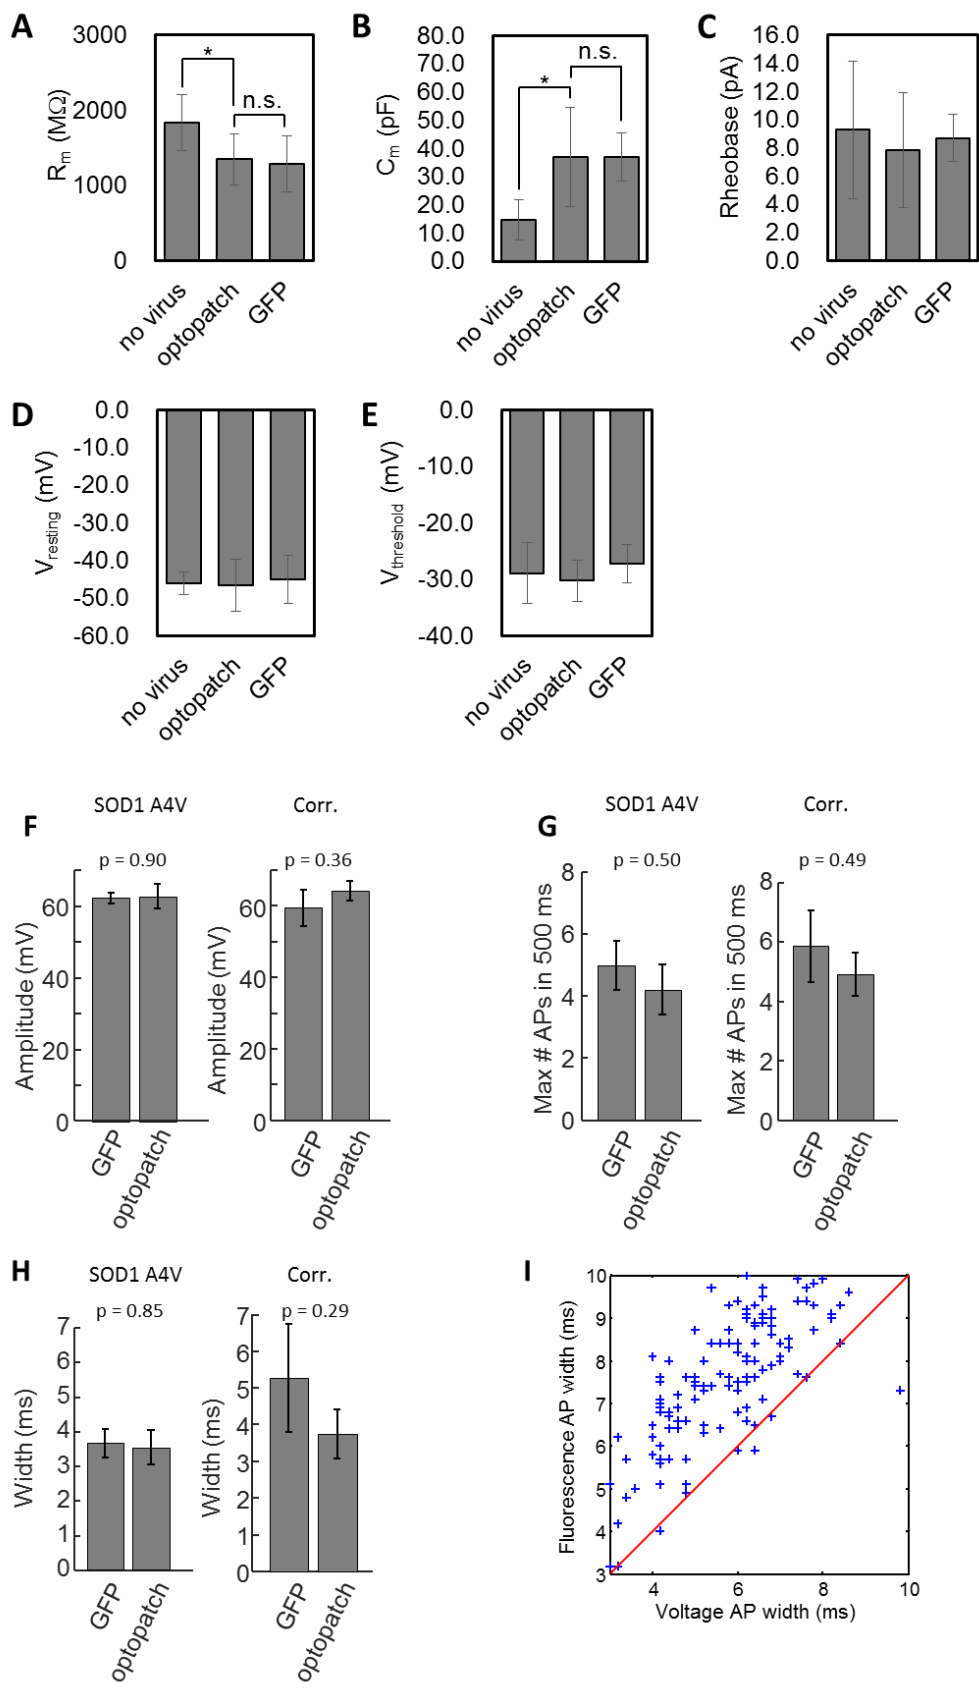

**Figure S2.** Validation of Optopatch measurements in iPSC-MNs. Related to Fig. 2. **(A-E)** Effect of Optopatch expression on baseline electrophysiology. Comparisons between iPSC-MNs expressing no lentivirus, Optopatch constructs, or an eGFP control showed no significant differences between Optopatch and eGFP expression in **(A)** membrane resistance, **(B)** membrane capacitance, **(C)** rheobase current, **(D)** resting potential, and **(E)** action potential initiation threshold (See Table S1). The CaMKII $\alpha$  promoter targeted expression (of either eGFP or Optopatch) to more mature, and hence larger MNs (Prè et al., 2014), leading to smaller membrane resistance and larger membrane capacitance compared to non-transduced cells. Error bars represent s.e.m.. Measurements were on  $n = 10 - 14$  cells per condition. **(F - H)** Comparison of spiking parameters in iPSC-MNs expressing either Optopatch constructs or an eGFP positive control, as recorded by manual patch clamp. Current was injected in 500 ms pulses of nineteen amplitudes (5 pA to 95 pA;  $n = 8$  39b-Cor cells with eGFP,  $n = 15$  39b-Cor cells without Optopatch,  $n = 9$  39b cells with eGFP and  $n = 9$  39b cells with Optopatch). **(F)** Within each genotype, cells that expressed eGFP and those that expressed Optopatch had indistinguishable average action potential amplitude ( $p = 0.90$  for 39b,  $p = 0.36$  for 39b-Cor, unpaired t-test). **(G)** The cells reached indistinguishable maximum firing rates ( $p = 0.50$  for 39b,  $p = 0.49$  for 39b-Cor, unpaired t-test). **(H)** The width of the spikes at rheobase was indistinguishable ( $p = 0.85$  for 39b,  $p = 0.29$  for 39b-Cor, unpaired t-test). **(I)** Comparison of action potential width measured optically vs. electrically. Optical measurements reported an AP width that was greater than the electrically recorded width by  $1.8 \pm 1.1$  ms (mean  $\pm$  s.d.;  $n = 148$  spikes, 4 cells).



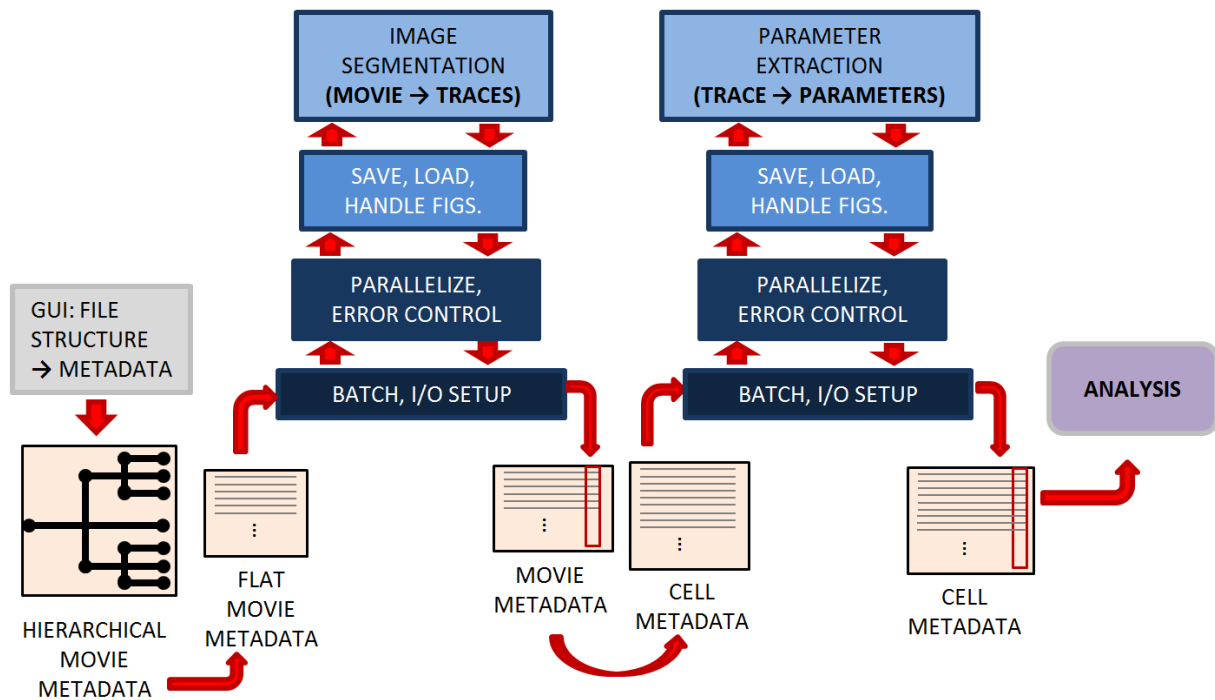

**Figure S3.** Data pipeline for image segmentation and spike parameterization. Related to Fig. 2. Metadata from each experiment and sub-experiment is created using a graphical user interface. The hierarchically organized metadata is then flattened into a matrix listing each recording and its associated metadata. This organization facilitates parallel analysis on a computer cluster. In the first stage of analysis, movies are translated into a set of fluorescence traces via image segmentation; morphological and expression level measurements are also recorded. Summary figures of each movie’s analysis are created and data from each movie’s analysis is saved individually. The metadata is then broken up by cell (rather than by movie) and sent to the parameter extraction pipeline which again is parallelized. In this stage, each cell’s fluorescence trace is loaded and parameterized. A summary figure is created and again the results are saved individually. The final list of cells and their parameterizations can then be loaded for further analysis. The entire pipeline is implemented in MATLAB and run on the Odyssey Research Computing cluster at Harvard University.

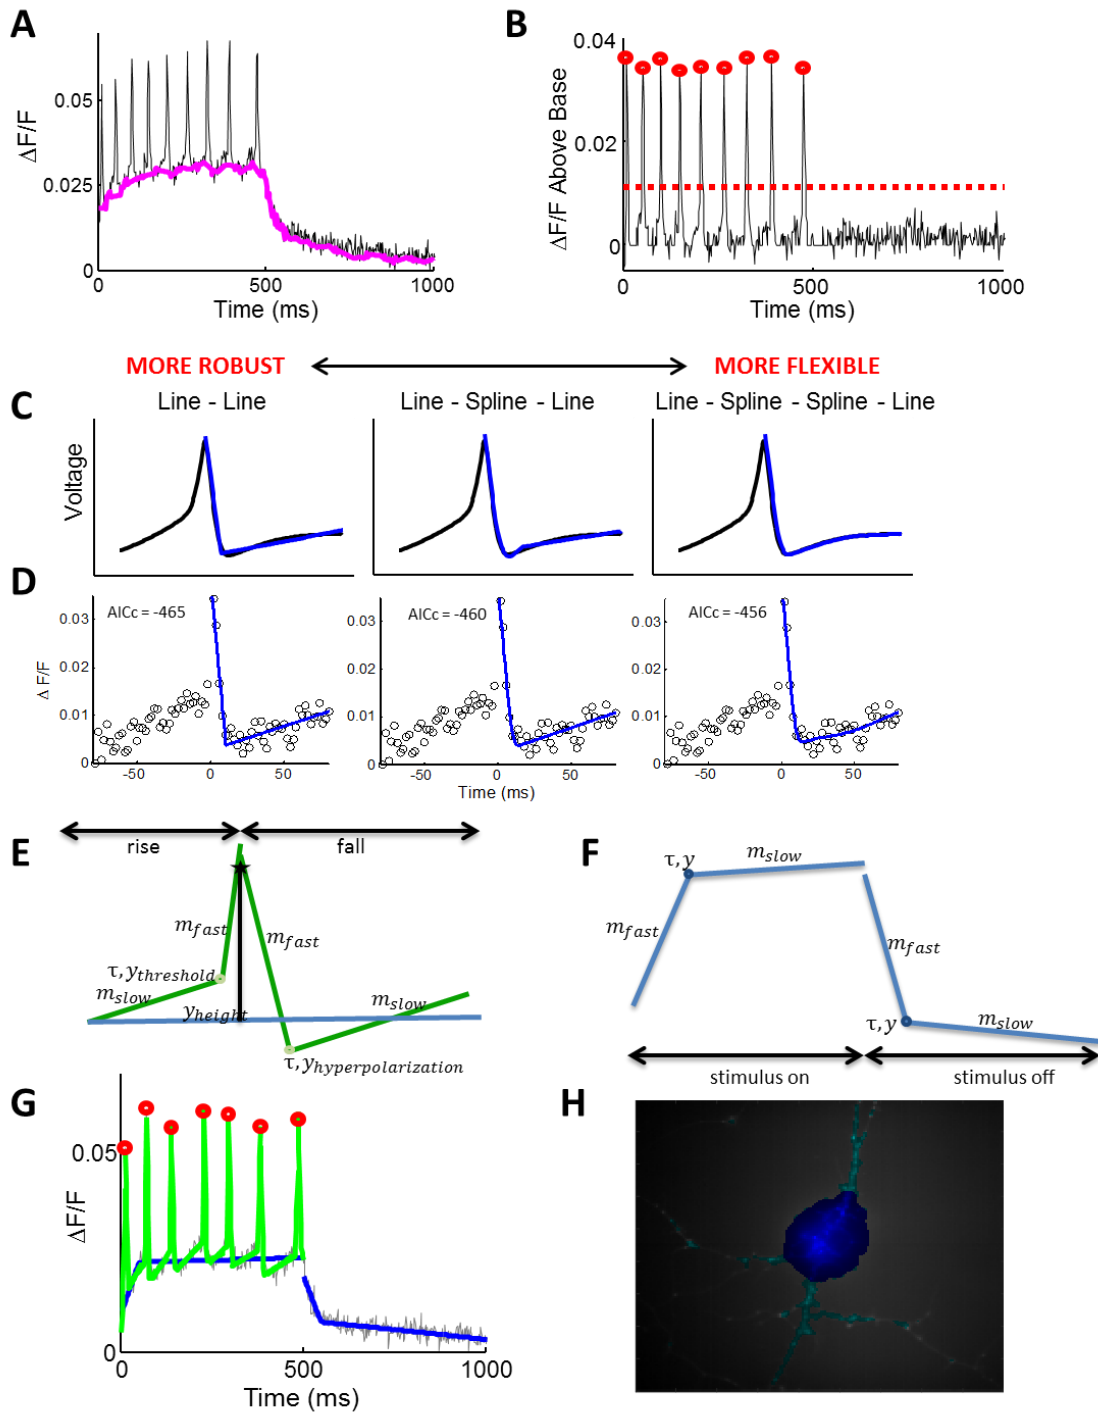

**Figure S4.** Data reduction and parameterization of spiking waveforms. Related to Fig. 2. **(A)** Fluorescence traces were temporally filtered with a specialty ordinal filter to separate spikes from baseline (window size of 20 ms, 40<sup>th</sup> percentile taken as baseline estimate). **(B)** A threshold for spike identification was set based on an estimate of the noise. **(C – F)** Information-theoretic determination of optimal

parameterization of optically recorded spike waveforms. We created a hierarchy of models with different number of parameters; adding more parameters increased flexibility but decreased robustness to noise. The least complex model of the AP downstroke consisted of two lines meeting at a point. The next model added one spline joining the two lines. The most flexible model contained two splines. **(C)** Fit of each model to an AP waveform recorded by manual patch clamp.(Bean, 2007) **(D)** Fit of each model to single-trial Optopatch data. Corrected Akaike’s information criterion (AICc) balances the quality-of-fit with the complexity of the model. Lower scores indicate a better model for the given data. In this example (as in 95% of tests), AICc was lowest for the least complex and most robust two-line model. **(E)** Parameterization of optically recorded action potential waveforms **(F)** and baseline waveforms. **(G)** Final parameterization, consisting of the fitted baseline and action potential models. **(H)** Automated identification of soma (dark blue) and processes (cyan) calculated from the activity-based map of the single-cell profile.

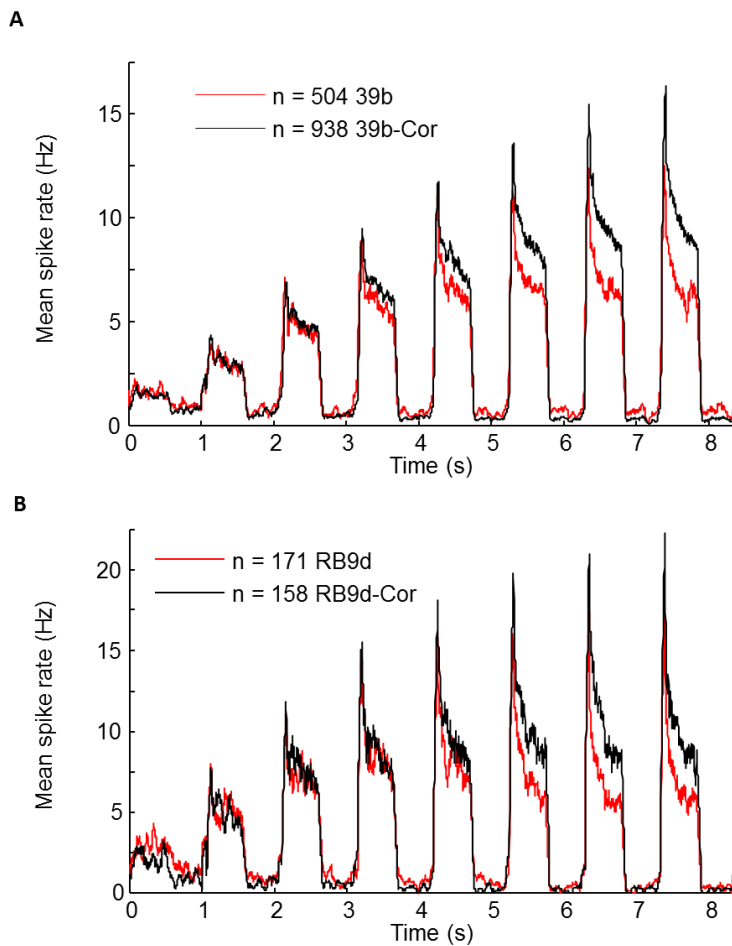

**Figure S5.** Replication of core experimental results in two distinct isogenic pairs. Related to Fig. 3. A) The 39b SOD1(A4V) line and its isogenic corrected pair. B) The RB9d SOD1(A4V) line and its isogenic corrected pair. As in the 39b cell line, the SOD1 (A4V) cells showed hyperexcitability under weak stimulus, but hypo-excitability under strong stimulus.

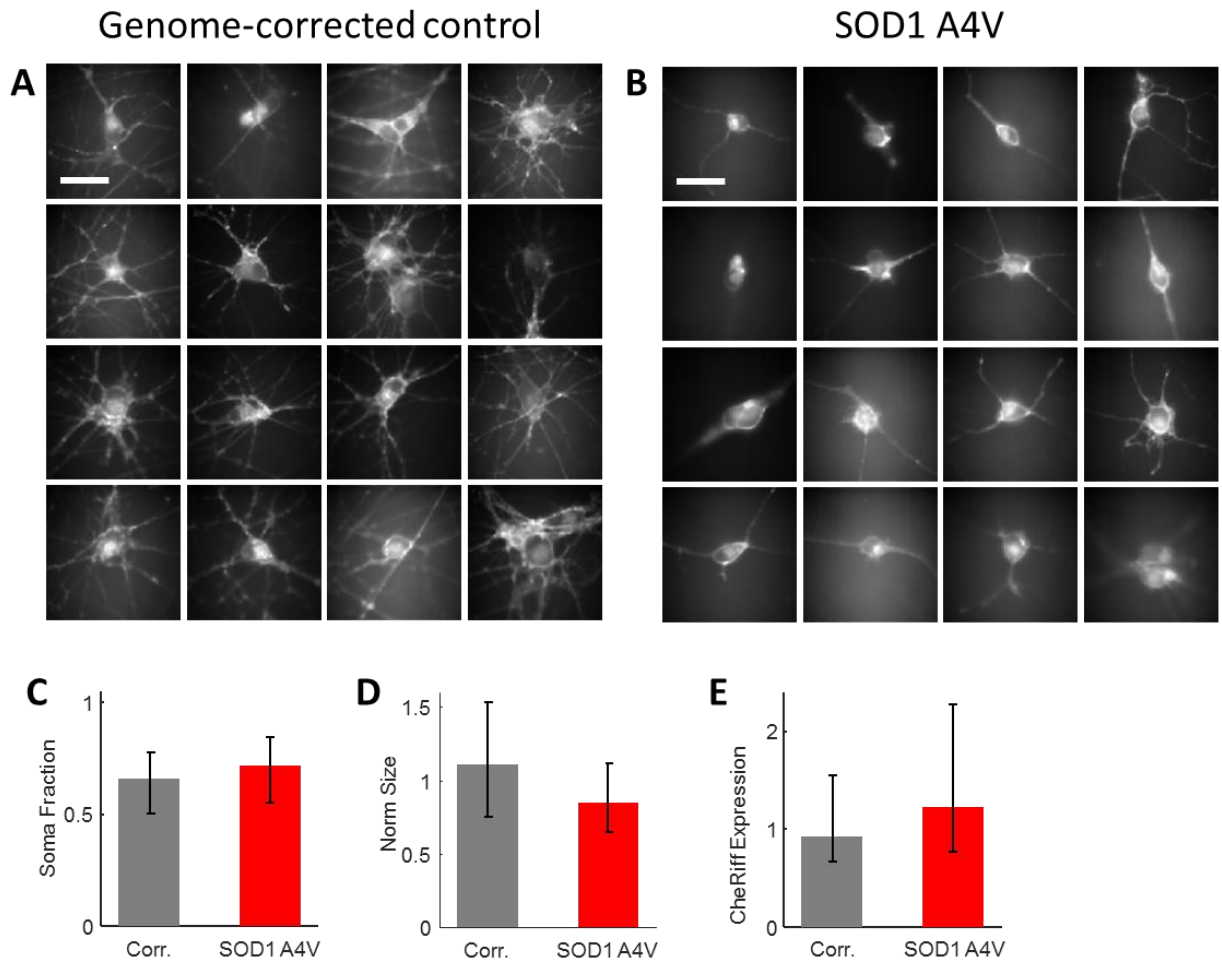

**Figure S6.** Morphological differences between control and SOD1 A4V motor neurons. Related to Fig. 3. Images show **(A)** corrected control and **(B)** *SOD1* A4V mutant iPSC-MN. Fluorescence is from QuasAr2. Scale bars in (A) and (B) 20  $\mu$ m. **(C)** Median fraction of the cell area occupied by soma (as opposed to dendrite) in the control and mutant iPSC-MNs; error bars show the 25<sup>th</sup> and 75<sup>th</sup> percentiles of the population. The difference between the two populations was significant to  $p = 1 \times 10^{-10}$  (0.66 in control, 0.72 in mutant, unpaired t-test). **(D)** Median size of the control and mutant cell somas, normalized to the population median; error bars show 25<sup>th</sup> and 75<sup>th</sup> percentile. The difference between the two populations was significant to  $p = 8 \times 10^{-17}$  (1.11 a.u. in control, 0.84 in mutant, unpaired t-test). **(E)** Difference in median CheRiff expression level between control and mutant cells, normalized to the whole population median. Error bars shows the 25<sup>th</sup> and 75<sup>th</sup> percentile. The difference between the two populations is significant (0.92 a.u. in control, 1.22 in mutant,  $p = 2 \times 10^{-5}$ , unpaired t-test). In C – E, control  $n = 843$  cells, mutant  $n = 331$  cells.

|                                 | no virus |           | Optopatch |           | eGFP  |           |
|---------------------------------|----------|-----------|-----------|-----------|-------|-----------|
|                                 | mean     | std. dev. | mean      | std. dev. | mean  | std. dev. |
| <b>R<sub>m</sub> (MΩ)</b>       | 1829     | 374       | 1345      | 339       | 1284  | 375       |
| <b>C<sub>m</sub> (pF)</b>       | 14.9     | 7.1       | 37.0      | 17.5      | 37.0  | 8.5       |
| <b>Resting potential (mV)</b>   | -46.2    | 3.0       | -46.6     | 6.9       | -45.0 | 6.4       |
| <b>Threshold potential (mV)</b> | -28.9    | 5.4       | -30.2     | 3.6       | -27.3 | 3.4       |
| <b>Rheobase (pA)</b>            | 9.2      | 4.9       | 7.8       | 4.1       | 8.7   | 1.7       |

**Table S1.** Comparison of electrophysiological parameters of iPSC-MN infected with either no virus, CaMKIIa-driven Optopatch, or CaMKIIa-driven eGFP. The data are shown graphically in Fig. S2.

#### SOD1 A4V – Corr. Difference

| Rise slow slope (dF/F)/ms | Rise fast slope (dF/F)/ms   | Rise time constant ms   | Threshold dF/F          | Height dF/F                | Fall fast slope (dF/F)/ms | Fall slow slope (dF/F)/ms | Fall time constant ms      | Hyperpolarization dF/F     |
|---------------------------|-----------------------------|-------------------------|-------------------------|----------------------------|---------------------------|---------------------------|----------------------------|----------------------------|
| +2.1E-5 (+28%), p = 0.72  | -1.5E-3 (-18%), p = 9.9E-11 | +0.31 (+5%), p = 3.7E-7 | +1.3E-4 (+3%), p = 0.78 | -4.4E-3 (-10%), p = 2.5E-7 | +4.9E-4 (+9%), p = 6.6E-5 | +2.6E-5 (+103%), p = 0.60 | +3.4E-3 (+0.04%), p = 0.95 | -5.7E-4 (-22%), p = 1.8E-3 |

#### Change with Number of APs per Stimulus

| Rise slow slope (dF/F)/ms  | Rise fast slope (dF/F)/ms | Rise time constant ms     | Threshold dF/F             | Height dF/F                | Fall fast slope (dF/F)/ms | Fall slow slope (dF/F)/ms | Fall time constant ms       | Hyperpolarization dF/F   |
|----------------------------|---------------------------|---------------------------|----------------------------|----------------------------|---------------------------|---------------------------|-----------------------------|--------------------------|
| -1.6E-5 (-21%), p = 1.8E-9 | +1.2E-4 (1%), p = 3.2E-4  | -1.8E-3 (-0.03%), p = 1.0 | -5.0E-4 (-14%), p = 6E-123 | +4.0E-4 (0.9%), p = 1.2E-3 | -2.2E-5 (-0.4%), p = 0.48 | -7.5E-7 (-3%), p = 1.0    | -4.6E-2 (-0.5%), p = 2.0E-7 | +4.0E-4 (15%), p = 8E-70 |

#### Change with Increasing Stimulus at Maximum Firing Rate

| Rise slow slope (dF/F)/ms | Rise fast slope (dF/F)/ms | Rise time constant ms   | Threshold dF/F            | Height dF/F                | Fall fast slope (dF/F)/ms  | Fall slow slope (dF/F)/ms | Fall time constant ms     | Hyperpolarization dF/F    |
|---------------------------|---------------------------|-------------------------|---------------------------|----------------------------|----------------------------|---------------------------|---------------------------|---------------------------|
| -2.8E-5 (-38%), p = 0.10  | -7.3E-4 (-9%), p = 6.4E-7 | +0.26 (+4%), p = 1.1E-3 | -4.7E-4 (-13%), p = 0.044 | -3.9E-3 (-9%), p = 1.3E-16 | +4.3E-4 (+8%), p = 6.8E-10 | -2.4E-5 (-95%), p = 0.44  | -3.0E-2 (-0.3%), p = 0.73 | +8.4E-4 (+32%), p = 0.027 |

**Table S2.** Changes in action potential waveform parameters between SOD1 A4V and genome corrected controls (see Figure S5 for definitions). We performed a linear regression to determine the factors that influenced average waveform parameters for each stimulus and each cell, up to the stimulus at which



the maximum firing rate first occurred. The control parameters were: cell line (mutant or control, a categorical variable), number of action potentials in the stimulus epoch, stimulus strength (to control for blue light-induced photoartifacts), and dish recording day (to control for day-to-day variability). Each column of the **SOD1 A4V - Corr. Difference** table lists the regression coefficient for genotype (mutant vs. control), the percent change relative to the control's average, and the p value from the regression coefficient t-test. Coefficients are highlighted in olive-green which are significant to an  $\alpha = 0.01$  threshold after Holm-Bonferroni multiple hypothesis correction (9 hypotheses from the 9 parameters).

|                       | Rise slow slope<br>(dF/F)/ms         | Rise fast slope<br>(dF/F)/ms         | Rise time constant<br>ms             | Threshold<br>dF/F                    | Height<br>dF/F                      | Fall fast slope<br>(dF/F)/ms          | Fall slow slope<br>(dF/F)/ms         | Fall time constant<br>ms            | Hyperpolarization<br>dF/F             |
|-----------------------|--------------------------------------|--------------------------------------|--------------------------------------|--------------------------------------|-------------------------------------|---------------------------------------|--------------------------------------|-------------------------------------|---------------------------------------|
| <b>K<sub>V7</sub></b> | +4.4E-5<br>(+35%)<br>$\beta = 0.20$  | +1.7E-3<br>(+15%)<br>$\beta = 0.24$  | -7.0E-1<br>(-12%)<br>$\beta = -0.20$ | +2.2E-3<br>(+132%)<br>$\beta = 0.68$ | +6.0E-3<br>(+11%)<br>$\beta = 0.49$ | -1.5E-3<br>(-15%)<br>$\beta = -0.23$  | +1.0E-5<br>(+25%)<br>$\beta = 0.05$  | -3.2E-1<br>(-5%)<br>$\beta = -0.09$ | -1.5E-3<br>(-109%)<br>$\beta = -0.63$ |
| <b>K<sub>dr</sub></b> | +1.6E-4<br>(+128%)<br>$\beta = 0.67$ | +1.4E-3<br>(+13%)<br>$\beta = 0.18$  | -8.4E-1<br>(-15%)<br>$\beta = -0.23$ | +4.2E-3<br>(+253%)<br>$\beta = 1.26$ | +3.6E-3<br>(+6%)<br>$\beta = 0.29$  | -5.7E-3<br>(-57%)<br>$\beta = -0.96$  | +1.9E-4<br>(+468%)<br>$\beta = 0.78$ | -2.4<br>(-39%)<br>$\beta = -0.81$   | -3.8E-3<br>(-267%)<br>$\beta = -1.35$ |
| <b>Na</b>             | +8.7E-5<br>(+67%)<br>$\beta = 0.10$  | +2.4E-2<br>(+211%)<br>$\beta = 1.81$ | -5.8<br>(-102%)<br>$\beta = -1.13$   | +1.9E-3<br>(+117%)<br>$\beta = 0.30$ | +4.1E-2<br>(+73%)<br>$\beta = 2.44$ | -1.6E-2<br>(-165%)<br>$\beta = -1.76$ | +9.9E-6<br>(+24%)<br>$\beta = 0.01$  | -4.6<br>(-74%)<br>$\beta = -1.05$   | +8.5E-4<br>(+60%)<br>$\beta = 0.16$   |

**Table S3.** Change in action potential waveform in numerical simulations with increases in channel conductance. For each channel or set of channels, simulations were run with a range of conductances and a range of optogenetic stimulus strengths corresponding to changes in channelrhodopsin conductance ( $g_m$ , see Fig. 6). The simulated voltage trace was down-sampled to match the data acquisition frame rate (500 Hz), and action potentials were fit with the same set of parameters used in the fluorescence data. We then fit a linear regression on the average waveform parameter from each step with control variables for the channel conductance and the input conductance. Rows of the table show the regression coefficient (in units of waveform parameter per base simulation conductance) for variations in K<sub>V7</sub>, delayed rectifier K<sub>V</sub>, and Na<sub>V</sub>. The coefficient as a percentage of the base simulation average is shown in parenthesis. As another indicator of the strength of the relationship we also show the coefficient as a fraction of its standard deviation,  $\beta$  (we can write  $\beta = \frac{T}{\sqrt{N-3}}$  where  $T$  is the t-statistic and  $N - 3$  is the number of degrees of freedom in our regression).

## Supplemental Discussion

### Optical crosstalk in Optopatch measurements

The fluorescence signal showed a slow increase in baseline during each optical stimulus epoch (Fig. 1D). This increase did not occur in patch clamp recordings with optical stimulation, indicating that the increase did not correspond to a real increase in membrane potential. The increase also did not occur in optical recordings with stimulation via current injection from the patch pipette, indicating that the increase was not a slow response of the voltage indicator to membrane depolarization. The increase only occurred with simultaneous blue light stimulation and fluorescence imaging. These observations implied that the increase in baseline fluorescence was due to blue light photo-production of a fluorescent product. This effect was not observed in prior experiments with rodent primary neurons due to higher CheRiff expression in the rodent cells (and consequently lower blue light intensities), and better membrane trafficking of QuasAr2 in the rodent cells.

### Spike parameterization and model reduction

In functional fitting, choosing a good functional form is critical. On the one hand, it must be capable of fitting the data well and providing a meaningful description of relevant parameters; on the other hand, it must be robust and avoid over-fitting. We first attempted to fit action potential data with exponential rise and decay functions, but the fit was often qualitatively poor. We found more success with combinations of lines and splines. For instance, to describe the shape of an action potential after its peak, one line could be used to fit the fast action potential down-stroke, a connected spline segment to model the after-hyperpolarization, and then another connected line to fit the return to baseline (Fig. S4).

To address the problem of robustness and overfitting we employed an information-theoretic model reduction scheme. Our line-spline-line functions lent themselves well to the creation of a hierarchy of models with varying degrees of complexity (Fig. S4). We tested three models, with zero, one, or two splines between two lines. The point at which each segment (line or spline) joined with the next was allowed to vary along both the  $\Delta F$  and time axes, but continuity between segments was enforced. These models had four, six and eight parameters respectively: the slope of the two lines and position of one, two, or three joining points.

To balance the tradeoff between quality-of-fit and model complexity we employed corrected Akaike information criteria (AICc). (Burnham and Anderson, 2003) This criterion enabled us to choose the model with the best level of complexity for our data, based on how closely the data matched the model, how many parameters must be fit in the model, and how many data points are being fit.

Our likelihood function assumed Gaussian noise in  $\Delta F$ ; the width of the distribution was estimated by subtracting a median filtered copy of each cell's recording (to remove baseline fluctuations) and then taking the 50<sup>th</sup> minus the 16<sup>th</sup> percentile in the residual. We fit a sample of 200 action potentials randomly selected from 50 cells using the three models. Although these functional models describe action potential shape well both pre- and post-peak, we focused on post-peak since after-hyperpolarization is in general more difficult to describe. The results from AICc showed that the simplest model (0 splines) was optimal in 95% of sample action potentials, versus 3% for the one-spline model and 2% for the two-spline model. We therefore used the simplest model. We fit the pre- and

post-peak sections of each action potential separately to a pair of lines which could vary in their slope and the point at which they met (Fig. S4). We called this model a “variable hinge.”

### **AP waveform statistics**

We studied action potential waveforms in the pre-depolarization block regime. Here, after the first two spikes upon stimulus onset, cells typically settled into a consistent limit cycle with little change in action potential waveform over the course of the stimulus (Fig. 5). We therefore averaged together the parameters of the waveforms of each action potential after the first 100 ms of stimulation.

As action potential firing rate increased, action potential waveforms changed. We constructed a linear model for each average action potential waveform parameter from each step stimulus, with a control coefficient for the number of action potentials in the step from which the waveform was taken. To control for any residual variation caused by blue light crosstalk, we also included a control coefficient for the stimulus number in our linear model. To study differences between control and mutant lines, we added a categorical variable to the model for cell line (this variable was non-interacting with the others). The model was fit to a dataset containing waveform parameters from every step in every cell up to and including the first step at which the maximum firing rate was reached. In reporting parameters that changed significantly between the two populations, we applied the Holm-Bonferroni method to correct for multiple hypothesis testing (see Methods). Regression coefficients and p values are presented in Table S2.

We compared the set of differences and similarities between action potential waveforms from mutant and control cells to other axes of variability between action potential waveforms. The set of genotype-dependent changes was different from those which occurred as the firing rate increased (Table S2). Genotype-dependent changes were nearly identical, however, to the set of changes which occurred as one moved from the first stimulus at which the maximum firing rate was reached to the last stimulus at which the maximum firing rate occurred before depolarization block (Table S2). This observation suggests that the differences in waveform between control and mutant cell lines may come from the same mechanism that produced differences in the probability of depolarization block.

### **Supplemental Experimental Procedures**

#### **Immunocytochemistry**

Cell cultures were fixed in 4% PFA for 15 min at 4 °C, permeabilized with 0.2% Triton-X in PBS for 2 hours and blocked with 10% donkey serum in PBS-T (Triton 0.1%). Cells were then incubated in primary antibody overnight and secondary antibodies for 1 hour in 2% donkey serum in PBS-T after several washes in between. DNA was visualized by a Hoechst stain. The following antibodies were used: Islet1 (1:200, DSHB, 40.2D6), TUJ1 (1:1000, Sigma, T2200), MAP2 (1:10000, Abcam ab5392), GFP (1:500, Life Technologies, A10262). Secondary antibodies used (488, 555, 594, and 647) were AlexaFluor (1:1000, Life Technologies) and DyLight (1:500, Jackson ImmunoResearch Laboratories).

#### **Virus production**

Lentivirus was produced in HEK293-T cells from previously described plasmids (Hochbaum et al., 2014) DRH334 (CamKII $\alpha$ -QuasAr2, Addgene plasmid 51692) and DRH313 (CamKII $\alpha$ -CheRiff, Addgene plasmid

51693). HEK293-T cells were grown in 15 cm dishes to ~50% confluence at 37 °C and 5% CO<sub>2</sub>. Transfection of each gene, as well as packaging and coat proteins (psPAX2 and VSVg, respectively), was performed with poly-ethylenimine (PEI). For each 15 cm dish, a cocktail of 22 µg psPAX2, 16 µg gene, and 10 µg VSVg was suspended in 500 µL of Optimem. PEI was added to the Optimem mixture (140 µL from a 1 mg/mL stock) and vortexed briefly to mix. The mixture was incubated at room temperature for 15 minutes. After incubation, 25 mL of pre-warmed DMEM was added to the DNA/PEI mixture and gently mixed. Medium was aspirated off the 15 cm plate and the DNA/PEI/DMEM mixture was added gently onto the cells and the plate was returned to the incubator. After 48 hours, the supernatant was collected and spun for 5 minutes at 1200 g to pellet any collected cells. The supernatant was then filtered through a 0.45 µm filter, aliquoted into 1.5 mL volumes, and frozen at -80 °C.

### **Gene delivery**

Approximately 40,000 cells of differentiated motor neuron cultures were plated on poly-D-lysine/laminin-coated 35 mm glass bottom dishes (MatTek) for Optopatch recordings. Each dish was transduced with lentiviruses 7-10 days before scheduled recording times. A mixture of 200 µL of QuasAr2 and 70 µL of CheRiff lentiviruses were combined with 200 µL of the complete neurobasal medium, added onto the cells and left overnight in the incubator. The next morning the virus mixture was removed, plates were washed and replenished with fresh, complete neurobasal medium.

### **Data analysis**

#### **Data cleaning**

Under external synchronous triggering, the Flash 4.0 camera rounds the exposure time to the nearest 10 µs. This variation in exposure time is inconsequential for long exposures, but led to spurious noise of 0.5% at an exposure time of 2 ms, due to the asynchronicity of the computer clock triggering the camera and the camera's internal clock. We used the whole-field image intensity to estimate this rounding error and then divided the pixel values in each frame by the estimated exposure time to correct for the variation in exposure time.

#### **Image processing and segmentation**

Our image segmentation pipeline was adapted from that of Mukamel and coworkers (Mukamel et al., 2009) and consisted of pre-process filtering, PCA-ICA in the time domain, and post-process statistical analysis. A key technical challenge in the analysis was that each pixel had a low signal-to-noise ratio (SNR) due to the short exposure time (2 ms) and the low intrinsic brightness of QuasAr2. Noise from neighboring pixels was uncorrelated, while true signals from neighboring pixels tended to be correlated because each cell extended over many pixels. We thus started the analysis by performing median spatial filtering to improve the per-pixel signal-to-noise ratio. This procedure also removed the effect of sparse bad pixels in the camera image sensor.

A second key challenge was that the dominant fluorescence dynamics corresponded to (a) whole-field photobleaching, and (b) stepwise increases and decreases in whole-cell fluorescence triggered by the blue stimulus illumination. Both of these sources of temporal variation were highly correlated between cells and thus were not good signals for activity-based image segmentation. Single-

cell spiking patterns, however, were statistically independent between cells and provided a robust segmentation signal. We therefore applied high-pass filtering in the time domain with a mean-subtracted Gaussian filter set to accentuate action potentials (window size of 20 ms, Gaussian with standard deviation of 3 ms).

A third key challenge was that the signals of interest were sparse in space and time, while the noise was broadly distributed. The PCA-ICA protocol involved calculations of cross-correlation functions. Inclusion of noise-dominated elements of the data in these calculations led to increases in noise without improvements in beneficial signal. We therefore chose only to apply PCA-ICA to the region in time corresponding to our staircase stimulation, rather than including the spontaneous imaging region, since most activity occurred during stimulation.

Using the notation  $A_{x,y}$  for matrices where  $x$  and  $y$  represent the domains a matrix maps *from* and *to* respectively, these last two steps translated a movie matrix  $M_{r,T}$  (where  $r$  is the pixel domain and  $T$  is the time domain) into a high-pass-filtered and abbreviated movie matrix  $H_{r,t}$  (where  $t$  is the abbreviated time domain).

There were fewer frames than pixels in our movies, so we employed time-domain-covariance matrix PCA to reduce dimensionality of the data. The covariance matrix  $H_{r,t}^T H_{r,t}$  was decomposed into its eigenvectors  $E$  with eigenvalues in the diagonal matrix  $D$ ; the twenty with the largest eigenvalues were retained to form the eigenvector/principal component matrix  $E_{t,p}^T$  (where  $p$  is the principal component index). We applied ICA to the matrix  $E_{t,p}^T$  using the FastICA algorithm with a symmetric approach. The expected distribution of fluorescence values for each pixel was a Gaussian (noise) with a one-sided long tail (action potentials). This distribution has high skew and so we employed the function  $g(u) = u^3$  as a contrast function. (Hyvärinen and Oja, 2000) Six independent components,  $C_{t,v}$ , were calculated, but these did not correspond to true neuronal activity waveforms because they were extracted from the temporally high-pass-filtered movie.

ICA produced a separation matrix  $S_{p,v}$  which mapped from the principal component domain to the ICA temporal voices domain ( $v$ ), i.e.  $C_{t,v} = E_{t,p} S_{p,v}$ . We generated a spatial filter  $F_{r,v}$  which mapped from the spatial pixel domain to the spatial voices domain:

$$F_{r,v} = H_{r,t} E_{t,p} D^{-1} S_{p,v}.$$

Application of this filter to each frame of the original movie provided a final fluorescence trace,  $T_{v,T}$ , for each cell in the movie, i.e.  $T_{v,T} = F_{r,v}^T M_{r,T}$ .

Once the traces were constructed, we performed spike finding (see below). Traces with five or fewer spikes in the entire recording were considered to be either noise or inactive cells and were discarded. A common failure mode for ICA produced traces with positive spikes on top of an inverted baseline. These were also automatically discarded by checking for negative changes in baseline during high stimulus.

We also extracted an image of each cell,  $I_{r,v}$ , by cross-correlating the high-pass-filtered time-trace of each cell with the high-pass-filtered movie, i.e.  $I_{r,v} = H_{r,t} C_{t,v}$ . Cells may be partially overlapping but they are still spatially sparse in the sense that they typically only cover a relatively small region of the whole frame. The distribution of values in  $I_{r,v}$  comprised Poisson-distributed background noise, with a long tail corresponding to the cell. We set a dynamic threshold of 1.8 times the estimated Poisson parameter  $\lambda$  to determine which pixels were most likely to be on-cell. The final cell mask for a



given cell  $v_j$  was then given by  $R_{r_i, v_j} = I[I_{r_i, v_j} > 1.8 * \frac{(\sum_{k=1}^{r_{max}} I_{r_k, v_j})}{r_{max}}]$  where  $I$  is the indicator function and  $r_{max}$  is total number of pixels.

### Morphological analysis and calibration of $\Delta F/F$

The PCA-ICA method described above produced traces which were scaled and offset versions of the true fluorescence trace; while this is acceptable for spike-counting, comparison of spike waveforms required an estimate of the underlying fractional change in fluorescence,  $\Delta F/F$ . To the extent that resting potentials were approximately the same between cells,  $\Delta F/F$  provided a measure of relative changes in voltage and thus enabled comparisons of spike amplitude and after-hyperpolarization.

A naïve algorithm would simply fit the clean but uncalibrated ICA-generated trace to a noisy trace with true  $\Delta F/F$  generated from averaging the raw signal over the entire area of the cell. That is, we might take the average trace  $A_{v_k, T} = R_{r, v_k}^* M_{r, T}$  for a given cell and scale the uncalibrated trace to match:  $T'_{v_k, T} = \hat{a} T_{v_k, T} + \hat{b}$  where  $\hat{a}, \hat{b} = \operatorname{argmin}_{a, b} \left( \sum_{i=1}^{T_{max}} (a T_{v_k, T_i} + b - A_{v_k, T_i})^2 \right)$ . Then the baseline (the  $F$  in  $\Delta F/F$ ) would come from low pass filtering this new trace  $T'_{v_k, T}$ , and spikes (the  $\Delta F$ ) would be measured relative to this baseline. The problem is that the average trace  $A_{v_k, T}$  may contain crosstalk from other cells. We therefore sought a better way to estimate an unbiased offset and amplitude for the fluorescence signal.

Instead of using the entire cell mask ( $R_{r, v}$ ) to calculate  $A_{v, T}$ , we identified spatial regions which were unobstructed by neighboring cells. For a cell indexed by  $v_k$  we calculated the “pure” mask by excluding all the pixels at which other cells were present:

$$P_{r, v_k} = (1 - R_{r, v_1}) \odot (1 - R_{r, v_2}) \odot \dots \odot (1 - R_{r, v_{k-1}}) \odot R_{r, v_k} \odot (1 - R_{r, v_{k+1}}) \odot \dots \odot (1 - R_{r, v_{max}})$$

where  $\odot$  represents elementwise multiplication. In certain rare cases a cell had no regions which were not shared by others. These cells were excluded. To further refine our mask, we identified those pixels within the pure region which matched the ICA-derived trace as closely as possible. We first high pass filtered the movie and the ICA-derived trace in the time domain with a mean-subtracted Gaussian filter set to accentuate action potentials (window size of 20 ms, Gaussian with standard deviation of 3 ms), giving the movie  $M_{r, T}^f = P_{r, v}^* M_{r, T} \otimes G_T$  and the trace  $T_{v, T}^f = T_{v, T} \otimes G_T$  where  $\otimes$  represents a convolution and  $G_T$  represents the temporal filter. Following the maximum likelihood pixel weighting algorithm described in Kralj *et al.* (Kralj *et al.*, 2012), we calculated for each pixel of the movie a set of coefficients describing the best fit (by a least squares error) of the ICA-derived trace to the pixel trace. The error on this best fit, normalized the variance of the pixel’s signal, gives an indicator of quality-of-fit:

$$\zeta_{r, v_k} = \frac{\min_{a, b} \left( \sum_{i=1}^{T_{max}} (a T_{v_k, T_i}^f + b - M_{v_k, T_i}^f)^2 \right)}{\sum_{i=1}^{T_{max}} (M_{v_k, T_i}^f - \frac{1}{T_{max}} \sum_{i=1}^{T_{max}} M_{v_k, T_i}^f)^2}. \text{ Our final mask was then } Z_{r_i, v_k} = \frac{1}{\zeta_r} \begin{cases} 1/\zeta_{r_i} & P_{r_i, v_k} = 1 \\ 0 & P_{r_i, v_k} = 0 \end{cases}. \text{ At}$$

last, we can construct a new average trace:  $A'_{v_k, T} = Z_{r_i, v_k}^* M_{r, T}$  for each cell and perform the fit

$$\hat{a}, \hat{b} = \operatorname{argmin}_{a, b} \left( \sum_{i=1}^{T_{max}} (a T_{v_k, T_i} + b - A'_{v_k, T_i})^2 \right) \text{ to obtain a trace with real fluorescence units,}$$

$$T'_{v_k, T} = \hat{a} T_{v_k, T} + \hat{b}.$$

This fluorescence signal still contained artifacts from photobleaching. We estimated the photobleaching baseline using a filter that took the minimum in a sliding window of duration 1 s. Dividing the fluorescence signal by this photobleaching estimate at each time point provided our final  $\Delta F/F$  trace.

### Estimating morphological parameters

We also used the cell mask,  $R_{r,v_j}$ , to study the structural morphology of each neuron (see *Morphological analysis* above). Soma and dendrite can be distinguished on the basis of how “thin” they are: pixels on the soma are likely to be surrounded by other on-cell pixels, while pixels on the dendrite are more likely to be adjacent to off-cell pixels. We applied morphological opening to the cell mask  $R_{r,v_j}$  with a disk-shaped structuring element of diameter 5 pixels ( $\sim 1 \mu\text{m}$ ). This procedure removed thin areas like dendrites but also shrank the soma. Then we applied morphological dilation with the same structuring element to restore the soma to its original size without restoring the dendrites. The set of on-cell pixels which are not on the soma,  $S$ , gives the dendrites. We can now directly calculate the fraction of the cell that is soma as  $\frac{\sum_{r_i} I[r_i \in S]}{\sum_{r_i} I[R_{r_i,v_j} = 1]}$  where  $I[\dots]$  is the indicator function.

### Spike finding

Identification of action potentials in fluorescence traces is complicated by two factors. The first is temporally uncorrelated photon shot noise; the second is low frequency changes in QuasAr2 baseline caused by photobleaching and blue light crosstalk. Action potentials lie at an intermediate frequency between these two noise sources. To deal with low frequency behavior we employed a specialty percentile filter to approximate the baseline fluorescence around each action potential. The filter identified those points in a sliding window (10 frames, 20 ms long) at the 40<sup>th</sup> percentile and assigned them baseline status. At points not assigned to the baseline, the local baseline value was inferred via linear interpolation. Signal height was then measured relative to this baseline. We found this method to be more robust than conventional linear filtering in regions of rapid baseline change: near stimulus onset, for example, it creates less “delay” in the baseline estimate while still enabling detection of action potentials.

To handle high frequency noise we set a dynamic threshold. The data were median-filtered (with a window of 400 ms) and the difference between the median and the 16<sup>th</sup> percentile (i.e.  $-\sigma$ ) was taken as a noise estimate. The threshold for spike detection in the high pass filtered data was set to five times this noise estimate. Our conclusions are robust to changes in this threshold multiplier value. Due to high frequency noise, occasionally the same spike crossed the threshold twice. To avoid double-counting, we set a hard limit on the time between two spikes (no less than 18 ms). We found only a very small number of cases where cells approached this frequency limit.

Once spikes were identified, all further characterization was performed on the original (unfiltered) trace.

### Spike parameterization

Spike parameterization is illustrated in Fig. S4 and the approach is justified in Supplemental Discussion. After identifying spikes, we defined windows around each spike on which to perform a functional fit. In the case of an isolated spike, these windows were set to -90 ms and +100 ms from the spike peak. When another spike was within this window, the window was shortened to avoid the neighboring peak. Windows were also truncated to avoid intersection with the stimulus turning on or off.

We fit the pre- and post-peak sections of each action potential separately with a piecewise function with two linear components (termed a “variable hinge”). The function is defined as  $f(t) = \begin{cases} y + m_1(t - x) & t \leq x \\ y + m_2(t - x) & t \geq x \end{cases}$ . To perform the fit we employed a constrained gradient descent algorithm to minimize least-squares error. Strictly piecewise functions are difficult to optimize, so we approximated  $f(t)$  using logistic functions with fast time constants compared to the steepest action potentials. That is, we used  $f(t) = y + m_1(t - x) \left( \frac{1}{1 + e^{-\frac{(t-x)}{\tau}}} \right) + m_2(t - x) \left( \frac{1}{1 + e^{-\frac{(x-t)}{\tau}}} \right)$ , where  $\tau$  is the timescale of the logistic (set to  $2 \times 10^{-6}$  ms). The error function was a Euclidean norm.

After this initial parameterization, we obtained a model for the baseline fluorescence. We first obtained an approximate estimate of the baseline by removing spikes from the fluorescence trace. Points between the pre- and post-peak time constants of an action potential (that is, near the peak) were removed and replaced with a local linear fit to the five points before and after these boundaries. The remaining baseline dynamics at stimulus on and stimulus off were fit separately with variable hinge models, as above.

In the model of the upstroke, the time coordinate of the meeting point was interpreted as the rise time constant and the y coordinate relative to the local baseline was interpreted as the action potential initiation threshold. In model of the downstroke, the time coordinate of the joint was interpreted as the fall time constant and the y coordinate of the joint relative to the local baseline was interpreted as the after-hyperpolarization. We defined action potential height (in units of  $\Delta F/F$ ) as the distance from the peak of each action potential to the local baseline, divided by the baseline. After-hyperpolarization was similarly defined as the distance from the  $\Delta F$  coordinate of the hinge point to the local baseline, divided by the baseline.

## Statistical methods

In all tests  $p < 0.01$  was considered statistically significant. Nonparametric tests were employed to characterize spontaneous firing rates, the distribution of which showed extreme non-normality. Unpaired t-tests were used to compare firing rates under stimulus, where the average number of action potentials produced was much higher than 0 and the statistics were more closely Gaussian. The Holm-Bonferroni method was used to correct for multiple hypothesis testing where appropriate (in particular, choosing between different mechanisms for high-stimulus differences in firing pattern and identifying significant changes in action potential waveform parameters).

A cell was considered to have entered depolarization block at a particular stimulus intensity if it fired its maximum number of action potentials in the previous stimulus epoch, its maximum number of action potentials was higher than three, and in the current stimulus epoch there were fewer action potentials and more than half of those action potentials occurred in the first half of the stimulus epoch. These constraints were constructed to avoid noise from random small differences in spike timing. Cells

which never fired more than three action potentials in a single stimulus were considered constitutively inactive and were excluded from further analysis.

To construct a CheRiff level-insensitive measure of activity, we studied the probability of depolarization block at stimulus  $n + 1$  conditional on a given number,  $Y$ , of action potentials at stimulus  $n$ . We call this probability  $P(\text{block}_{n+1} | Y_n)$ . We started with a dataset consisting of all stimulus epochs from all cells which contained more than three action potentials and which occurred prior to either depolarization block or prior to the last (strongest) stimulus. To avoid sampling errors, we further excluded stimulus epochs which contained the maximum number of action potentials (for that cell) but which were not the first stimulus epoch to do so; these would otherwise create a distortion which would depend on whether the last epoch in which the maximum number of action potentials occurred was the last epoch overall.

To calculate  $P(\text{block}_{n+1} | Y_n)$ , we employed a generalized linear regression with a binomial distribution and logit linker function, and used cell line (mutant or control), dish recording day (as described in the previous section), the number of action potentials in the current step, and the slope of the F-I curve prior to depolarization block as regression variables. The first two of these variables were treated as categorical. The slope of the F-I curve was included to account for marginal increases in the difference between effective stimulus conductance caused by variations in CheRiff. The given  $p$  values come from t-tests on these regression coefficients.

To calculate a CheRiff-independent measure of the maximum firing rate, we took only those cells that entered depolarization block to ensure that the maximum firing rate was reached prior to the strongest optogenetic stimulus. We further excluded cells which fired at their maximum rate for more than one stimulus, again to avoid sampling error. We then fit a linear regression to the maximum firing rates with cell line and dish recording day as categorical (non-interacting) regression variables. The given  $p$  values come from t-tests on these regression coefficients.

In our study of differences in action potential waveform, we first averaged together waveform parameters for all action potentials which occurred later than 100 ms after blue light onset within each stimulus epoch (during this initial period the rising baseline caused significant distortion). Our dataset then consisted of waveform parameters from each stimulus epoch that occurred at or before the first maximum in the F/I curve. We employed a linear regression with coefficients for cell line (mutant or control), dish recording day, the number of action potentials in the current step, and the stimulus epoch number (to account for residual distortions caused by blue light cross-talk). The first two variables were treated as categorical. The given  $p$  values come from t-tests on these regression coefficients. All statistical analysis was done in MATLAB.

## Simulations

We evaluated a Hodgkin-Huxley type model with parameters taken from Powers and co-workers' simulations of human motor neurons (Powers and Heckman, 2015, Powers et al., 2012). (The parameters described in the publications (Powers and Heckman, 2015, Powers et al., 2012) are incorrect and do not give spiking behavior; we instead used the parameters in the associated NEURON simulation files provided in ModelDB). The sodium channel activation parameters were adjusted to reflect the recording temperature in our protocol and the slow inactivation component was dropped for simplicity.  $K_V$ -activation parameters in Powers *et al.* were taken from a study (Kuo et al., 2006) in which recordings

were performed at the same temperature as in our experiments, and so were not adjusted. Basal  $K_V7$  conductances were doubled from 1 mS/cm<sup>2</sup> to 2 mS/cm<sup>2</sup>.

We used the Hodgkin-Huxley equation

$$C_m \frac{dV}{dt} = g_{Na} m^3 h (E_{Na} - V) + (g_K n^4 + g_{KV7} p^4) (E_K - V) + g_m (E_0 - V)$$

Here  $g_m$  is a combination of basal leak conductance and CheRiff input conductance. The inactivation particles' time evolution followed the form

$$\frac{dq}{dt} = \frac{q_{inf} - V}{\tau_q}$$

with the parameters

$$\tau_m = \max \left( \frac{1}{0.4 \frac{V+33}{1 - \exp\left(-\frac{V+33}{7.2}\right)} - 0.124 \frac{V+33}{1 - \exp\left(\frac{V+33}{7.2}\right)}}, 0.02 \right) \text{ ms}$$

$$m_{inf} = \frac{0.4 \frac{V+33}{1 - \exp\left(-\frac{V+33}{7.2}\right)}}{0.4 \frac{V+33}{1 - \exp\left(-\frac{V+33}{7.2}\right)} - 0.124 \frac{V+33}{1 - \exp\left(\frac{V+33}{7.2}\right)}}$$

$$\tau_h = \max \left( \frac{1}{0.03 \frac{V+48}{1 - \exp\left(-\frac{V+48}{1.5}\right)} - 0.01 \frac{V+48}{1 - \exp\left(\frac{V+48}{1.5}\right)}}, 0.5 \right) \text{ ms}$$

$$h_{inf} = \frac{1}{1 + \exp\left(\frac{V+53}{4}\right)}$$

$$\tau_n = 1.4 + \frac{11.9 \cdot \exp\left(\frac{V+39}{5.5}\right)}{\left(1 + \exp\left(\frac{V+39}{5.5}\right)\right)^2} \text{ ms}$$

$$n_{inf} = \frac{1}{1 + \exp\left(-\frac{V+25}{20}\right)}$$

$$\tau_p = 6.7 + \frac{93.3}{\exp\left(-\frac{V+61}{35}\right) + \exp\left(\frac{V+61}{25}\right)} \text{ ms}$$

$$p_{inf} = \frac{1}{1 + \exp\left(-\frac{V+61}{19.5}\right)}$$

where  $V$  is in millivolts. The ionic reversal potentials were set to

$$E_{Na} = 50 \text{ mV}; E_K = -77 \text{ mV}; E_0 = E_{ChR} = 0$$



where  $E_0$  is the leak reversal potential and  $E_{ChR}$  is the channelrhodopsin (CheRiff) reversal potential. Our model was evaluated in MATLAB using ode15s to handle stiff behavior, with a relative tolerance of 0.003.

Hodgkin-Huxley-type equations model a differential patch of membrane. We sought to account for the effects of variations in cell size and morphology without creating a full compartment or cable model. Since the active channels involved in action potential production are localized, an increase in cell size can produce an increase in total capacitance without a proportional increase in total active channel conductance. We therefore allowed the lumped capacitance  $C_m$  to be a tunable parameter and set it to produce maximum firing rates in the range of those seen experimentally (a maximum firing rate before depolarization block of 10-20 action potentials within a 500 ms stimulus); in the simulations shown, it is  $20 \frac{\mu F}{cm^2}$ . This represents an effective capacitive load, and is not intended to represent capacitance per geometrical membrane area.

For each set of conductance parameters, we allowed the system to evolve to steady state for 10 seconds prior to delivering stimuli. To identify spikes in the simulation, we looked for peaks 25 mV above the steady-state baseline (obtained via a specialty ordinal filter, as discussed in *Spike finding*). Depolarization block was defined in the same way as in the real data. For step stimulations, the input conductance  $g_m$  was turned on with a time constant of 1 ms. When the cell reached steady state (without entering depolarization block) we obtained more precise measurements of firing rate by running the simulation for 2500 ms and then multiplying the number of action potentials found by 1/5 to obtain the expected number of action potentials per 500 ms, as displayed in [Fig. 6](#).

Spike waveforms were parameterized using the same algorithm as was applied to real data. Simulated voltage time traces were down-sampled and their action potentials parameterized using the same models as applied to the real data. We then fit a linear regression on the average waveform parameter from each step with control variables for the channel conductance and the input conductance ([Table S3](#)).

Bean, B.P. (2007). The action potential in mammalian central neurons. *Nature Reviews Neuroscience* 8, 451-465.

Burnham, K.P. and Anderson, D.R. (2003). *Model selection and multimodel inference: a practical information-theoretic approach* (: Springer Science & Business Media).

Hyvärinen, A. and Oja, E. (2000). Independent component analysis: algorithms and applications. *Neural Networks* 13, 411-430.

Kralj, J.M., Douglass, A.D., Hochbaum, D.R., Maclaurin, D. and Cohen, A.E. (2012). Optical recording of action potentials in mammalian neurons using a microbial rhodopsin. *Nat. Meth.* 9, 90-95.

Kuo, J., Lee, R., Zhang, L. and Heckman, C. (2006). Essential role of the persistent sodium current in spike initiation during slowly rising inputs in mouse spinal neurones. *J.Physiol.(Lond.)* 574, 819-834.

Mukamel, E.A., Nimmerjahn, A. and Schnitzer, M.J. (2009). Automated analysis of cellular signals from large-scale calcium imaging data. *Neuron* 63, 747-760.

Powers, R.K., Elbasiouny, S.M., Rymer, W.Z. and Heckman, C.J. (2012). Contribution of intrinsic properties and synaptic inputs to motoneuron discharge patterns: a simulation study. *J.Neurophysiol.* 107, 808-823. Published online Feb. 10.1152/jn.00510.2011 [doi].

Powers, R.K. and Heckman, C.J. (2015). Contribution of intrinsic motoneuron properties to discharge hysteresis and its estimation based on paired motor unit recordings: a simulation study. *J.Neurophysiol.* 114, 184-198. Published online Jul. 10.1152/jn.00019.2015 [doi].

Prè, D., Nestor, M.W., Sproul, A.A., Jacob, S., Koppensteiner, P., Chinchalongporn, V., Zimmer, M., Yamamoto, A., Noggle, S.A. and Arancio, O. (2014). A time course analysis of the electrophysiological properties of neurons differentiated from human induced pluripotent stem cells (iPSCs). *PloS one* 9, e103418.
